# Supplementary material for: Antineoplastics Encapsulated in Nanostructured Lipid Carriers
Source: MDPI journal article supplement (doi:10.3390/molecules26226929), 2021-11-17
Supplement: s1 [file s1]

Table S1 – Articles on the encapsulation of antitumour agents in Nanostructured lipid carriers, from 2000-2021. Descriptions include AA, cancer type, NLC composition, preparation method, physicochemical properties - size, polydispersity (PDI), zeta potential (ZP) and encapsulation efficiency (%EE) - tests conducted and main achievements.

### Antimetabolite agents

| Drug                  | Tumour tested and route                    | Composition                                                                                                                                                                                  | Preparation method                 | Characterization                              | Physical-chemical properties                                                                                 | Tests conducted                                                                                        | Main results                                                            | Ref. | Ref. in the main text |
|-----------------------|--------------------------------------------|----------------------------------------------------------------------------------------------------------------------------------------------------------------------------------------------|------------------------------------|-----------------------------------------------|--------------------------------------------------------------------------------------------------------------|--------------------------------------------------------------------------------------------------------|-------------------------------------------------------------------------|------|-----------------------|
| 5-fluorouracil (5-FU) | Hepatocellular carcinoma (HepG2) cell line | (Synthetic lipids)<br><br>Solid lipid: GMS<br><br>Liquid lipid: OA or Labrafac 5<br><br>Surfactant: Lecithin Tween 80 or Solutol HS15<br><br>Functionalization: Galactisilated-stearyl amine | Emulsification-solvent diffusion   | DLS<br>Microscopy (SEM)<br>DSC<br>FTIR<br>NMR | Size<br>139.2 nm<br><br>PDI<br>0.5<br><br>ZP<br>−18 mV<br><br>%EE<br>34.2%<br><br>Stability:<br>Not informed | Pharm. development<br><br><i>In vitro</i> tests                                                        | ✓ Improved cytotoxicity<br>✓ Enhanced drug uptake to HepG2 tumour cells | [1]  | [27]                  |
| 5-FU                  | Not tested                                 | (Synthetic lipids)<br><br>Solid lipid: Precirol ATO 5<br><br>Liquid lipid: Labrasol<br><br>Surfactant P-188 Solutol HS15                                                                     | High-pressure homogenization (HPH) | DLS<br>Microscopy (TEM)                       | Size<br>211.2±4.9 nm<br><br>PDI<br>0.412±0.065<br><br>ZP<br>−21.6±0.7 mV<br><br>%EE<br>82.42 ± 3.14%         | Pharm. development<br><br><i>In vitro</i> tests<br><br><i>In vivo</i> : Skin permeation and irritation | ✓ Increased 5-FU permeation<br>✓ Reduced skin irritation                | [2]  | -                     |

|                     |                                                         |                                                                                                                                                   |                                          |                                                  |                                                                                                                    |                                                                                               |                                                                                                                                                             |     |      |
|---------------------|---------------------------------------------------------|---------------------------------------------------------------------------------------------------------------------------------------------------|------------------------------------------|--------------------------------------------------|--------------------------------------------------------------------------------------------------------------------|-----------------------------------------------------------------------------------------------|-------------------------------------------------------------------------------------------------------------------------------------------------------------|-----|------|
|                     |                                                         |                                                                                                                                                   |                                          |                                                  | Stability:<br>Not informed                                                                                         |                                                                                               |                                                                                                                                                             |     |      |
| 5-FU                | Not tested                                              | (Synthetic lipids)<br><br>Solid lipid:<br>Tripalmitin<br>Tristearin<br><br>Liquid lipid:<br>Transcutol<br><br>Surfactant:<br>Lecithin<br>Tween 80 | High-pressure<br>homogenization<br>(HPH) | DLS<br>Microscopy (TEM)<br>DSC<br>XRD            | Size<br>205.8 nm<br><br>PDI<br>0.279<br><br>ZP<br>−30.20 mV<br><br>%EE<br>48.17%<br><br>Stability:<br>Not informed | Pharm.<br>development<br><br><i>In vitro</i> tests<br><br><i>In vivo</i> :<br>Skin permeation | ✓ Increased 5-FU permeation                                                                                                                                 | [3] | -    |
| Cytarabine<br>(CYT) | Meningeal<br>leukemia (EL-4)<br>cell line               | (Synthetic lipids)<br><br>Solid lipid:<br>SA<br><br>Liquid lipid:<br>OA<br><br>Surfactant:<br>Polysorbate 80                                      | Sonication or ultra-<br>sonication       | DLS<br>Microscopy<br>(TEM)<br>DSC<br>XRD         | Size<br>90.7 nm<br><br>PDI<br>0.16<br><br>ZP<br>-24.2 mV<br><br>%EE<br>49.5%<br><br>Stability:<br>3 months         | Pharm.<br>development<br><br><i>In vitro</i> tests                                            | ✓ Improved cytotoxicity<br>against EL-4 cells                                                                                                               | [4] | [29] |
| Decitabine<br>(DCB) | Human non-small<br>cell lung cancer<br>(A549) cell line | (Synthetic lipids)<br><br>Solid lipid:<br>Precirol ATO5<br><br>Liquid lipid:                                                                      | High-pressure<br>homogenization<br>(HPH) | DLS<br>Microscopy<br>(AFM and TEM)<br>DSC<br>XRD | Size<br>116.66 nm<br><br>PDI<br>0.194                                                                              | Pharm.<br>development<br><br><i>In vitro</i> tests<br><br><i>Ex vivo</i> :                    | ✓ Improved cytotoxicity<br>✓ Improved bioavailability<br>after oral administration<br>than intravenously DCB<br>administration<br>✓ Improved gut permeation | [5] | [14] |

|                    |                                                                      |                                                                                                                        |                                |                              |                                                                                                                      |                                                           |                                                    |     |      |
|--------------------|----------------------------------------------------------------------|------------------------------------------------------------------------------------------------------------------------|--------------------------------|------------------------------|----------------------------------------------------------------------------------------------------------------------|-----------------------------------------------------------|----------------------------------------------------|-----|------|
|                    | Ehrlich Ascites Tumour (EAT) bearing mice<br><br>Oral delivery       | Transcutol<br><br>Surfactants:<br>Tween 80<br>P-188<br>Solutol HS 15                                                   |                                |                              | ZP<br>−31.8 mV<br><br>%EE<br>84.42 ± 5.38%<br><br>Stability:<br>45 days                                              | Gut permeation<br><br><i>In vivo</i> :<br>Biodistribution |                                                    |     |      |
| Methotrexate (MTX) | Human prostate cancer (DU-145) and ovarian cancer (A2780) cell lines | (Synthetic lipids)<br><br>Solid lipid: Imwitor 812<br><br>Liquid lipid: Neobee<br><br>Surfactant: Cremophor RH40 P-188 | Sonication or ultra-sonication | DLS Microscopy (TEM)         | Size<br>255.56±15.40<br><br>PDI<br>0.140±0.08<br><br>ZP<br>−25.0±2.70<br><br>%EE<br>60%<br><br>Stability:<br>90 days | Pharm. development<br><br><i>In vitro</i> tests           | ✓ Improved cytotoxicity in ovarian cancer cells    | [6] | [33] |
| MTX                | Not tested                                                           | (Synthetic lipids)<br><br>Solid lipid: Witepsol E85<br><br>Liquid lipid: Miglyol 812<br><br>Surfactant: PVA            | Sonication or ultra-sonication | DLS Microscopy (TEM)<br>FTIR | Size<br>252 nm<br><br>PDI<br>0.06<br><br>ZP<br>−14 mV<br><br>%EE<br>87%<br><br>Stability:<br>4 weeks                 | Pharm. development<br><br><i>In vitro</i> tests           | ✓ No toxicity in fibroblasts<br>✓ Safe application | [7] | [34] |

|     |                                       |                                                                                                                                                          |                                |                                       |                                                                                                                            |                                                    |                                                                                    |     |      |
|-----|---------------------------------------|----------------------------------------------------------------------------------------------------------------------------------------------------------|--------------------------------|---------------------------------------|----------------------------------------------------------------------------------------------------------------------------|----------------------------------------------------|------------------------------------------------------------------------------------|-----|------|
| MTX | Human breast cancer cell (MDA-MB-231) | (Synthetic lipids)<br><br>Solid lipid:<br>Witepsol E85<br><br>Liquid lipid:<br>Miglyol 812<br><br>Surfactant:<br>PVA<br><br>Functionalization:<br>SPIONs | Sonication or ultra-sonication | DLS                                   | Size<br>214 ± 3 nm<br><br>PDI<br>0.090 ± 0.017<br><br>ZP<br>-12.6 ± 1.6 mV<br><br>%EE<br>75%<br><br>Stability:<br>3 months | Pharm.<br>development<br><br><i>In vitro</i> tests | ✓ Improved cytotoxicity<br>✓ Hemo-compatibility<br>✓ Caveolae-mediated endocytosis | [8] | [35] |
| MTX | Tested in normal cells                | (Synthetic lipids)<br><br>Solid lipid:<br>cetyl palmitate<br><br>Liquid lipid:<br>Miglyol 812<br><br>Surfactant<br>Polysorbate 80                        | Sonication or ultra-sonication | DLS<br>Microscopy<br>(TEM / Cryo-SEM) | Size<br>458 nm<br><br>PDI<br>0.260<br><br>ZP<br>-24 mV<br><br>%EE<br>83%<br><br>Stability:<br>3 months                     | Pharm.<br>development<br><br><i>In vitro</i> tests | ✓ Low toxicity in fibroblasts and human keratinocytes                              | [9] | -    |

## Antimitotic agents

| Drug | Tumour tested and route | Composition | Preparation method | Characterization | Physical-chemical properties | Tests conducted | Main results | Ref. | Ref. in the review |
|------|-------------------------|-------------|--------------------|------------------|------------------------------|-----------------|--------------|------|--------------------|
|------|-------------------------|-------------|--------------------|------------------|------------------------------|-----------------|--------------|------|--------------------|

|                   |                                                                                                                                                                    |                                                                                                                                                       |                                    |                                               |                                                                                                                     |                                                                                                        |                                                                                                                           |      |      |
|-------------------|--------------------------------------------------------------------------------------------------------------------------------------------------------------------|-------------------------------------------------------------------------------------------------------------------------------------------------------|------------------------------------|-----------------------------------------------|---------------------------------------------------------------------------------------------------------------------|--------------------------------------------------------------------------------------------------------|---------------------------------------------------------------------------------------------------------------------------|------|------|
| Cabazitaxel (CBZ) | Human breast adenocarcinoma (MDA-MB-468 and MCF-7) cell lines                                                                                                      | (Synthetic lipids)<br><br>Solid lipid: Precirol ATO5<br><br>Liquid lipid: Labrafac PG<br><br>Surfactant: Tween 80                                     | Microemulsion technique            | DLS<br>Microscopy (SEM)<br>DSC<br>XRD<br>FTIR | Size 102.90 nm<br><br>PDI 0.140<br><br>ZP -23.00 mV<br><br>%EE 84.12 ± 1.1%<br><br>Stability: 60 days               | Pharm. development<br><br><i>In vitro</i> tests                                                        | ✓ High cellular uptake and apoptosis<br>✓ Improved cytotoxicity                                                           | [10] | [38] |
| Docetaxel (DTX)   | Human ovarian carcinoma (SKOV3), human prostate cancer (LNCaP, PC-3 and DU145) and MCF-7 cell lines<br><br>SKOV3 cell xenograft mouse model<br><br>Intratumourally | (Synthetic lipids)<br><br>Solid lipid: Precirol ATO 5<br><br>Liquid lipid: Labrafil M 1944<br><br>Surfactant: PVA Tween 20<br><br>Functionating: RIPL | Emulsification-solvent evaporation | DLS<br>Microscopy (TEM)<br>DSC                | Size 240.83 ± 3.44 nm<br><br>PDI 0.265<br><br>ZP 14.27 ± 0.78 mV<br><br>%EE 97.59 ± 0.13%<br><br>Stability: 2 weeks | Pharm. development<br><br><i>In vitro</i> tests<br><br><i>In vivo</i> : Tumour growth inhibition (TGI) | ✓ Improved tumour inhibition<br>✓ No body weight loss                                                                     | [11] | -    |
| DTX               | Fibrosarcoma (HT1080), MCF-7, A549 and human mouth epidermoid carcinoma (KB) cell lines                                                                            | (Synthetic lipids)<br><br>Solid lipid: Crodamol SS<br><br>Liquid lipid: Crodamol GTCC                                                                 | Sonication or ultra-sonication     | DLS<br>Microscopy (TEM)                       | Size 35.57 ± 0.31 nm<br><br>PDI 0.10 ± 0.01<br><br>ZP -0.29 ± 0.17 mV                                               | Pharm. development<br><br><i>In vitro</i> tests<br><br><i>In vivo</i> : TGI                            | ✓ Increased cell uptake<br>✓ Improved cytotoxicity<br>✓ Increased tumour cell apoptosis.<br>✓ Greater antitumour efficacy | [12] | -    |

|     |                                                                                                                                                                                    |                                                                                                                                                                                       |                                |                                                      |                                                                                                                                                 |                                                                                                                                                      |                                                                                                                          |      |      |
|-----|------------------------------------------------------------------------------------------------------------------------------------------------------------------------------------|---------------------------------------------------------------------------------------------------------------------------------------------------------------------------------------|--------------------------------|------------------------------------------------------|-------------------------------------------------------------------------------------------------------------------------------------------------|------------------------------------------------------------------------------------------------------------------------------------------------------|--------------------------------------------------------------------------------------------------------------------------|------|------|
|     | <b>KB</b> tumour-bearing mice<br><br>Intravenous                                                                                                                                   | Surfactant:<br>Soy lecithin and Solutol HS15                                                                                                                                          |                                |                                                      | %EE<br>97.47 ± 0.90%<br><br>Stability:<br>Not informed                                                                                          |                                                                                                                                                      |                                                                                                                          |      |      |
| DTX | Human cells lines: <b>HepG2</b> , <b>SKOV3</b> , <b>A549</b> and murine malignant melanoma ( <b>B16</b> ) cell line<br><br>Mice implanted with <b>B16</b> cells<br><br>Intravenous | (Synthetic lipids)<br><br>Solid lipid:<br>GMS<br>SA<br><br>Liquid lipid:<br>OA<br><br>Surfactants:<br>P-188<br>Soya lecithin                                                          | Sonication or ultra-sonication | DLS<br>Microscopy (TEM)                              | Size<br>193.47 ± 5.69 nm<br><br>PDI<br>Not informed<br><br>ZP<br>-33.17 ± 1.20 mV<br><br>%EE<br>89.72 ± 0.89%<br><br>Stability:<br>Not informed | Pharm.<br>development<br><br><i>In vitro</i> tests<br><br><i>In vivo</i> :<br>TGI                                                                    | ✓ Superior antitumour activity<br>✓ Minor side effects compared to Duopafei                                              | [13] | -    |
| DTX | Not tested                                                                                                                                                                         | (Synthetic lipids)<br><br>Solid lipid:<br>Precifac ATO 5<br><br>Liquid lipid:<br>MCT<br><br>Surfactant:<br>Tween 80<br>Soybean lecithin<br><br>Functionalization:<br>Cysteine-PEG-MSA | Sonication or ultra-sonication | DLS<br>Microscopy (TEM)<br>DSC<br>NMR<br>FTIR<br>XPS | Size<br>96.6 ± 8.0 nm<br><br>PDI<br>0.196 ± 0.004<br><br>ZP<br>-13.72 ± 0.07 mV<br><br>%EE<br>99.27 ± 0.44%<br><br>Stability:<br>Not informed   | Pharm.<br>Development<br><br><i>In situ</i> :<br>perfusion<br>experiments<br><br><i>In vivo</i> :<br>Rat biodistribution,<br>and<br>pharmacokinetics | ✓ Cysteine increased mucoadhesion<br>✓ Increased bioavailability after oral administration<br>✓ Improved drug absorption | [14] | [43] |
| DTX | <b>MCF-7</b> , <b>DU 145</b> ,                                                                                                                                                     | (Synthetic lipids)                                                                                                                                                                    | Microemulsion technique        | DLS<br>Microscopy (SEM)                              | Size<br>170.7 ± 3.78 nm                                                                                                                         | Pharm.<br>development                                                                                                                                | ✓ Improved cytotoxicity                                                                                                  | [15] | -    |

|     |                                                                     |                                                                                                                                                                                           |                                  |                                       |                                                                                                                                                        |                                                                                                                      |                                                                                                                                          |      |      |
|-----|---------------------------------------------------------------------|-------------------------------------------------------------------------------------------------------------------------------------------------------------------------------------------|----------------------------------|---------------------------------------|--------------------------------------------------------------------------------------------------------------------------------------------------------|----------------------------------------------------------------------------------------------------------------------|------------------------------------------------------------------------------------------------------------------------------------------|------|------|
|     | Glioblastoma (U-87MG) cell lines                                    | Solid lipid:<br>Molten M<br><br>Liquid lipid:<br>Capmul MCM<br><br>Surfactant:<br>Tween 80 Transcutol HP                                                                                  |                                  | DSC<br>XRD<br>FTIR                    | PDI<br>$0.192 \pm 0.027$<br><br>ZP<br>$-3.87 \pm 0.048$ mV<br><br>%EE<br>$70.42 \pm 3.68\%$<br><br>Stability:<br>12 months                             | <i>In vitro</i> tests<br><br><i>In vivo</i> :<br>Pharmacokinetic using a rat model administered by intravenous route | ✓ Improved bioavailability<br>✓ The <i>in vivo</i> toxicological studies of did not show changes organs studied (heart, liver and lungs) |      |      |
| DTX | SKOV3 cells<br><br>SKOV3-xenografted mouse model<br><br>Intravenous | (Synthetic lipids)<br><br>Solid lipid:<br>Precirol ATO 5<br><br>Liquid lipid:<br>Labrafil M 1944 CS<br><br>Surfactant: Polysorbate 20<br>PVA<br><br>Functionalization:<br>PEGylated -RIPL | Emulsification-evaporation       | DLS<br>Microscopy (TEM and CLSM)      | Size<br>$187.1 \pm 6.6$ nm<br><br>PDI<br>$0.328 \pm 0.053$<br><br>ZP<br>$-17.2 \pm 0.2$ mV<br><br>%EE<br>$94.8 \pm 0.2\%$<br><br>Stability:<br>4 weeks | Pharm. development<br><br><i>In vitro</i> tests<br><br><i>In vivo</i> :<br>Antitumour effects                        | ✓ Increased cell apoptosis.<br>✓ Improved antitumour effect                                                                              | [16] | [45] |
| DTX | Not tested                                                          | (Synthetic lipids)<br><br>Solid lipid:<br>Precirol ATO 5<br><br>Liquid lipid:<br>MCT<br><br>Surfactant:                                                                                   | Hot High-pressure homogenization | DLS<br>Microscopy (TEM)<br>DSC<br>XRD | Size<br>$245.3 \pm 13.6$ nm<br><br>PDI<br>Not informed<br><br>ZP<br>$-38.8$ mV                                                                         | Pharm. development<br><br><i>In vitro</i> test: release<br><br><i>In vivo</i> :                                      | ✓ Improved bioavailability<br>✓ High uptake in reticuloendothelial system organs<br>✓ Concentration of DTX in the lungs was higher       | [17] | -    |

|     |                                                                                                                    |                                                                                                                                                                   |                                    |                                       |                                                                                                                                                 |                                                                                                                                                   |                                                                                                        |      |      |
|-----|--------------------------------------------------------------------------------------------------------------------|-------------------------------------------------------------------------------------------------------------------------------------------------------------------|------------------------------------|---------------------------------------|-------------------------------------------------------------------------------------------------------------------------------------------------|---------------------------------------------------------------------------------------------------------------------------------------------------|--------------------------------------------------------------------------------------------------------|------|------|
|     |                                                                                                                    | Soybean lecithin<br>Brij 78                                                                                                                                       |                                    |                                       | %EE<br>97.8 ± 1.5%<br><br>Stability:<br>6 months                                                                                                | Pharmacokinetic<br>using a rat model<br>administered by<br>intravenous route                                                                      |                                                                                                        |      |      |
| DTX | Cervical cancer<br>( <b>HeLa</b> ) cell line<br><br><b>HeLa</b> tumour<br>xenograft mice<br><br>Intravenous        | (Synthetic lipids)<br><br>Solid lipid:<br>GMS<br><br>Liquid lipid:<br>OA<br><br>Surfactant:<br>PC<br><br>Functionalization:<br>SA-PEG-FA                          | Sonication or ultra-<br>sonication | DLS<br>Microscopy (TEM)               | Size<br>~ 30 nm<br><br>PDI<br>Not informed<br><br>ZP<br>Not informed<br><br>%EE<br>Not informed                                                 | Pharm.<br>development<br><br><i>In vitro</i> tests<br><br><i>In vivo</i> :<br>Tissue distribution<br>and antitumour<br>effects                    | ✓ Increased tumour<br>accumulation<br>✓ Higher antitumour<br>efficacy                                  | [18] | [44] |
| DTX | <b>HepG2</b> , <b>A549</b> and<br>mouse <b>B16</b> cell lines<br><br>Mice with <b>B16</b> cells<br><br>Intravenous | (Synthetic lipids)<br><br>Solid lipid:<br>GMS<br>SA<br><br>Liquid lipid:<br>MCT<br><br>Surfactant:<br>P-188<br><br>Functionalization:<br>DSPE-PEG-NH <sub>2</sub> | Solvent diffusion<br>method        | DLS<br>Microscopy (TEM)               | Size<br>168.70 ± 2.07 nm<br><br>PDI<br>0.195 ± 0.01<br><br>ZP<br>– 28.89 ± 1.3 mV<br><br>%EE<br>98.43 ± 0.51%<br><br>Stability:<br>Not informed | Pharm.<br>development<br><br><i>In vitro</i> tests<br><br><i>In vivo</i> :<br>Efficacy,<br>pharmacokinetics<br>and tissue<br>distribution effects | ✓ Superior antitumour<br>efficacy against<br>malignant melanoma <i>in<br/>vitro</i> and <i>in vivo</i> | [19] | [42] |
| DTX | Human lung cancer<br>( <b>NCL-H460</b> ) cell<br>line                                                              | (Synthetic lipids)<br><br>Solid lipid:<br>Precirol ATO 5                                                                                                          | High-pressure<br>homogenization    | DLS<br>Microscopy (TEM)<br>DSC<br>XRD | Size<br>154.1 ± 3.13 nm<br><br>PDI                                                                                                              | Pharm.<br>development<br><br><i>In vitro</i> tests                                                                                                | ✓ Improved cytotoxicity                                                                                | [20] | -    |



|     |                                              |                                                                                                                                                                           |                                  |                                |                                                                                                                         |                                                                                                                                                                  |                                                                                                                             |      |   |
|-----|----------------------------------------------|---------------------------------------------------------------------------------------------------------------------------------------------------------------------------|----------------------------------|--------------------------------|-------------------------------------------------------------------------------------------------------------------------|------------------------------------------------------------------------------------------------------------------------------------------------------------------|-----------------------------------------------------------------------------------------------------------------------------|------|---|
|     |                                              | Liquid lipid:<br>GMO<br><br>Surfactants:<br>Polysorbate 80                                                                                                                |                                  |                                | 0.376 ± 0.04<br><br>%EE<br>86.12 ± 3.48%<br><br>Stability:<br>6 months                                                  |                                                                                                                                                                  |                                                                                                                             |      |   |
| DTX | HeLa and B16 cell lines                      | (Synthetic lipids)<br><br>Solid lipid:<br>GMS<br><br>Liquid lipid:<br>OA<br><br>Surfactant:<br>P-188<br><br>Gel formulation:<br>Pluronic F127                             | Sonication or ultra-sonication   | DLS<br>Microscopy (TEM)<br>DSC | Size<br>123.5 nm<br><br>PDI<br>0.218<br><br>ZP<br>−33.44 ± 2.54 mV<br><br>%EE<br>80 ± 2.64%<br><br>Stability<br>30 days | Pharm.<br>development<br><br><i>In vitro</i> tests<br><br><i>In vivo</i> :<br>Tissue distribution studies in rats.                                               | ✓ Cytotoxicity was lower than free DTX on B16 and HeLa cells.<br>✓ Improved concentration on breast tissue                  | [21] | - |
| DTX | Sarcoma-180 cells in mice<br><br>Intravenous | (Synthetic lipids)<br><br>Solid lipid:<br>GMS<br><br>Liquid lipid:<br>Miglyol 812N<br><br>Surfactant/co-surfactant<br>P-188<br>Soybean lecithin<br><br>Functionalization: | High pressure hot homogenization | MS                             | Not informed                                                                                                            | Pharm.<br>development<br><br><i>In vivo</i><br>Pharmacokinetics and tissue distribution study using male pathogen-free Sprague–Dawley rats and male Kunming mice | ✓ Improved pharmacokinetic profile and distribution in tissues.<br>✓ Successful targeting of DTX, for skin cancer treatment | [22] | - |

|                  |                                                                                  |                                                                                                                                                |                                     |                                                                             |                                                                                                                                                                     |                                                                                                                             |                                                                                                                                                       |      |      |
|------------------|----------------------------------------------------------------------------------|------------------------------------------------------------------------------------------------------------------------------------------------|-------------------------------------|-----------------------------------------------------------------------------|---------------------------------------------------------------------------------------------------------------------------------------------------------------------|-----------------------------------------------------------------------------------------------------------------------------|-------------------------------------------------------------------------------------------------------------------------------------------------------|------|------|
|                  |                                                                                  | FA-PEG-PCHL                                                                                                                                    |                                     |                                                                             |                                                                                                                                                                     |                                                                                                                             |                                                                                                                                                       |      |      |
| DTX              | Human glioblastoma (U87 MG) and human grade IV glioblastoma (BTNW911) cell lines | (Synthetic lipids)<br>Solid lipid: Dynasan Phospholipon 90H<br>Liquid lipid: Labrasol Lauroglycol 90 Capryol<br>Surfactant: Lipoid S75         | Hot homogenization method           | DLS<br>NTA<br>Microscopy (TEM)<br>DSC<br>XRD<br>TGA<br>AF4<br>FTIR<br>Raman | Size<br>$123.300 \pm 0.642$ nm<br><br>PDI<br>$0.234 \pm 0.016$<br><br>ZP<br>$-32.400 \pm 0.967$ mV<br><br>%EE<br>$99.130 \pm 1.200\%$<br><br>Stability:<br>6 months | Pharm. development<br><br><i>In vitro</i> tests                                                                             | ✓ Superior cell internalization<br>✓ Improved cytotoxicity<br>✓ Decreased mitochondrial reserve capacity<br>Surpass of the blood-brain tumour barrier | [23] | [41] |
| DTX              | Tested in normal skin                                                            | (Synthetic lipids)<br>Solid lipid: GMS<br>Liquid lipid: CT<br>Surfactant: Egg lecithin<br>Functionalization: Nicotinamide<br>Gel: Carbomer 940 | Emulsion evaporation-solidification | DLS<br>Microscopy (CLSM and TEM)<br>PXRD<br>DSC<br>TGA<br>FTIR              | Size<br>$59.48 \pm 4.29$ nm<br><br>PDI<br>$0.24 \pm 0.08$<br><br>ZP<br>$-31.03 \pm 5.30$ mV<br><br>%EE<br>$79.48 \pm 8.02\%$<br><br>Stability:<br>Not informed      | Pharm. Development<br><br><i>In vitro</i> :<br>Permeation in abdominal rat skins<br><br><i>In vivo</i> :<br>skin permeation | ✓ <i>In vitro</i> , greater skin permeation promoted by DN<br>✓ <i>In vivo</i> , DN-NLC gel remained mostly on the inner skin                         | [24] | -    |
| Paclitaxel (PTX) | SKOV3 cells                                                                      | (Synthetic lipids)<br>Solid lipid:                                                                                                             | Sonication or ultra-sonication      | DLS<br>Microscopy                                                           | Size<br>$115.20 \pm 3.90$ nm                                                                                                                                        | Pharm. development                                                                                                          | ✓ Improved cytotoxicity                                                                                                                               | [25] | [54] |

|     |                                                                                |                                                                                                                                           |                                    |                                                         |                                                                                                                                 |                                                                                        |                                                             |      |      |
|-----|--------------------------------------------------------------------------------|-------------------------------------------------------------------------------------------------------------------------------------------|------------------------------------|---------------------------------------------------------|---------------------------------------------------------------------------------------------------------------------------------|----------------------------------------------------------------------------------------|-------------------------------------------------------------|------|------|
|     |                                                                                | GMS<br><br>Liquid lipid:<br>Capryol 90<br><br>Surfactant:<br>P-188<br>Tween 80<br><br>Functionalization:<br>Platelet membrane             |                                    | (CLSM / TEM /<br>STEM-EDS)<br>DSC<br>PXRD               | PDI<br>$0.284 \pm 0.015$<br><br>ZP<br>$-15.00 \pm 0.93$ mV<br><br>%EE<br>$99.88 \pm 0.01\%$<br><br>Stability:<br>Not informed   | <i>In vitro</i> tests                                                                  |                                                             |      |      |
| PTX | <b>MCF-7</b> cells<br><br>Mice bearing <b>MCF-7</b> tumours<br><br>Intravenous | (Synthetic lipids)<br><br>Solid lipid:<br>GMS<br><br>Liquid lipid:<br>OA<br><br>Surfactant:<br>Tween 20<br><br>Functionalization:<br>2-DG | Sonication or ultra-<br>sonication | Microscopy (TEM /<br>CLSM)<br>DSC<br>NIR<br>XRD<br>LPSA | Size<br>135.00 nm<br><br>PDI<br>$\sim 0.270$<br><br>ZP<br>$-21.8 \pm 1.60$ mV<br><br>%EE<br>95.50%<br><br>Stability:<br>90 days | Pharm.<br>development<br><br><i>In vitro</i> tests<br><br><i>In vivo</i> :<br>Efficacy | ✓ high anticancer<br>potential<br>✓ lower systemic toxicity | [26] | [48] |
| PTX | Human colorectal<br>adenocarcinoma<br>( <b>HT-29</b> ) cell line               | (Synthetic lipids)<br><br>Solid lipid:<br>Chol<br><br>Liquid lipid:<br>OA<br><br>Surfactant:<br>P-188                                     | Sonication or ultra-<br>sonication | DLS<br>Microscopy (AFM)                                 | Size<br>$181.6 \pm 14.8$ nm<br><br>PDI<br>$\sim 0.10$<br><br>ZP<br>$-12.9 \pm 0.2$ mV<br><br>%EE                                | Pharm.<br>development<br><br><i>In vitro</i> tests                                     | ✓ Improved cytotoxicity                                     | [27] | -    |

|     |                                                               |                                                                                                                                 |                                |                                |                                                                                                                                                 |                                                                                                                                                                                          |                                                                               |      |      |
|-----|---------------------------------------------------------------|---------------------------------------------------------------------------------------------------------------------------------|--------------------------------|--------------------------------|-------------------------------------------------------------------------------------------------------------------------------------------------|------------------------------------------------------------------------------------------------------------------------------------------------------------------------------------------|-------------------------------------------------------------------------------|------|------|
|     |                                                               |                                                                                                                                 |                                |                                | 53 ± 4.2%                                                                                                                                       |                                                                                                                                                                                          |                                                                               |      |      |
|     |                                                               |                                                                                                                                 |                                |                                | Stability:<br>Not informed                                                                                                                      |                                                                                                                                                                                          |                                                                               |      |      |
| PTX | HepG2 cells                                                   | (Natural lipids)<br><br>Solid lipid:<br>GMS<br><br>Liquid lipid:<br>Soybean oil<br>Chol<br><br>Surfactant:<br>Tween 80<br>P-188 | Sonication or ultra-sonication | DLS<br>Microscopy (TEM)        | Size<br>153.82 ± 5.58 nm<br><br>PDI<br>0.221 ± 0.02<br><br>ZP<br>-22.12 ± 2.48 mV<br><br>%EE<br>86.48 ± 6.46%<br><br>Stability:<br>Not informed | Pharm.<br>development<br><br><i>In vitro</i> tests<br><br><i>Ex vivo</i> :<br>Intestinal permeation<br><br><i>In vivo</i> :<br>Pharmacokinetic study in Wistar rats administrated orally | ✓ Improved cytotoxicity<br>✓ Improvement in oral bioavailability              | [28] | -    |
| PTX | Human epithelial colorectal adenocarcinoma cell line (Caco 2) | (Synthetic lipids)<br><br>Solid lipid:<br>GMS<br><br>Liquid lipid:<br>OA<br><br>Surfactant:<br>Tween 20                         | Sonication or ultra-sonication | DLS<br>Microscopy              | Size<br>283.4 ± 4.5 nm<br><br>PDI<br>0.226 ± 0.94<br><br>ZP<br>-25.12 mV<br><br>%EE<br>85.60%<br><br>Stability:<br>Not informed                 | Pharm.<br>development<br><br><i>In vitro</i> tests<br><br><i>In vivo</i> :<br>Organ distribution studies after pulmonary administration                                                  | ✓ Maximum cell uptake by Caco-2 cells<br>✓ Improved pulmonary bioavailability | [29] | [50] |
| PTX | Breast cancer (MCF-7 and MDA-MB-231) cell lines               | (Synthetic lipids)<br><br>Solid lipid:                                                                                          | Hot melting homogenization     | DLS<br>Microscopy (PLM)<br>DSC | Size<br>67 ± 15 nm                                                                                                                              | Pharm.<br>development                                                                                                                                                                    | ✓ Improved cytotoxicity                                                       | [30] | -    |

|     |                                 |                                                                                                                                                                     |                              |                       |                                                                                                                                                  |                                                                                                                                              |                                                                                           |      |      |
|-----|---------------------------------|---------------------------------------------------------------------------------------------------------------------------------------------------------------------|------------------------------|-----------------------|--------------------------------------------------------------------------------------------------------------------------------------------------|----------------------------------------------------------------------------------------------------------------------------------------------|-------------------------------------------------------------------------------------------|------|------|
|     |                                 | ATO<br><br>Liquid lipid:<br>Chol<br>Glycerol<br><br>Surfactant: Polysorbate 80                                                                                      |                              |                       | PDI<br>$0.30 \pm 0.12$<br><br>ZP<br>$-14.5 \pm 1.4$ mV<br><br>%EE<br>90%<br><br>Stability:<br>30 days                                            | <i>In vitro</i> tests                                                                                                                        |                                                                                           |      |      |
| PTX | A549 cells                      | (Synthetic lipids)<br><br>Solid lipid:<br>GMS<br><br>Liquid lipid:<br>MCT<br><br>Surfactant:<br>Kolliphor HS15<br>Gelucire 44/14<br><br>Functionalization:<br>SA-R8 | Fusion-emulsification method | DLS Microscopy (CLSM) | Size<br>$42.34 \pm 0.87$ nm<br><br>PDI<br>$0.2 \pm 0.01$<br><br>ZP<br>$16.84 \pm 0.96$ mV<br><br>%EE<br>65.94%<br><br>Stability:<br>Not informed | Pharm. development<br><br><i>In vitro</i> tests                                                                                              | ✓ Improved cytotoxicity                                                                   | [31] | [52] |
| PTX | MCF-7, A549 and HeLa cell lines | (Synthetic lipids)<br><br>Solid lipid:<br>SA<br><br>Liquid lipid:<br>OA<br><br>Surfactant:<br>P-188                                                                 | Solvent diffusion method     | DLS Microscopy (TEM)  | Size<br>237.10 nm<br><br>PDI<br>0.27<br><br>ZP<br>-33.9 mV<br><br>%EE<br>49%                                                                     | Pharm. development<br><br><i>In vitro</i> tests<br><br><i>In vivo</i> :<br>biodistribution in <i>Wistar</i> rats after intravenous injection | ✓ higher cell uptake<br>✓ <i>in vivo</i> higher uptake in folate receptor-positive organs | [32] | [53] |

|     |                                                                                                                                   |                                                                                                                                                      |                            |                               |                                                                                                                                                |                                                                                                                                             |                                                                                                                                   |      |      |
|-----|-----------------------------------------------------------------------------------------------------------------------------------|------------------------------------------------------------------------------------------------------------------------------------------------------|----------------------------|-------------------------------|------------------------------------------------------------------------------------------------------------------------------------------------|---------------------------------------------------------------------------------------------------------------------------------------------|-----------------------------------------------------------------------------------------------------------------------------------|------|------|
|     |                                                                                                                                   | Functionalization:<br>Fol-PEG-CHEMS                                                                                                                  |                            |                               | Stability:<br>Not informed                                                                                                                     |                                                                                                                                             |                                                                                                                                   |      |      |
| PTX | Murine melanoma (B16), mouse colon cancer (CT26) and human colon cancer (HCT116) cell lines<br><br>B16 in mice<br><br>Intravenous | (Synthetic /Natural lipids)<br><br>Solid lipid: GMS<br><br>Liquid lipid: Soybean oil<br><br>Surfactant: Soya lecithin<br><br>Functionalization: HA   | Hot emulsion method        | DLS Microscopy (TEM)          | Size<br>197.47 ± 8.24 nm<br><br>PDI<br>0.26 ± 0.03<br><br>ZP<br>-39.61 ± 0.69 mV<br><br>%EE<br>90.25 ± 0.41%<br><br>Stability:<br>Not informed | Pharm. development<br><br><i>In vitro</i> tests<br><br><i>In vivo</i> : Efficacy, pharmacokinetics and tissue distribution studies in rats. | ✓ Improved cytotoxicity<br>✓ Greater antitumour efficacy<br>✓ Prolonged circulation time in the blood<br>✓ Increased accumulation | [33] | [49] |
| PTX | HepG2 cells<br><br>H22 (murine liver cancer carcinoma cells) tumour xenograft mice<br><br>Intravenous                             | (Synthetic lipids)<br><br>Solid lipid: GMS<br><br>Liquid lipid: OA<br><br>Surfactant: PEG-SA<br><br>Functionalization: SA-polyethylene glycol-folate | Microemulsion technique    | DLS Microscopy (TEM)          | Size<br>25 ± 2.5 nm<br><br>PDI<br>0.102<br><br>ZP<br>Not informed<br><br>%EE<br>Not informed<br><br>Stability:<br>Not informed                 | Pharm. development<br><br><i>In vitro</i> tests<br><br><i>In vivo</i> : Tumour penetration and anti-tumour studies                          | ✓ Improved cytotoxicity<br>✓ Improved <i>in vivo</i> effect<br>✓ Low systemic toxicity                                            | [34] | -    |
| PTX | Human lung cancer (NCI-H1299) and murine sarcoma                                                                                  | (Synthetic lipids)<br><br>Solid lipid: ATO                                                                                                           | Emulsification–evaporation | DLS Microscopy (TEM and CLSM) | Size<br>63.27 ± 1.14 nm<br><br>PDI                                                                                                             | Pharm. development<br><br><i>In vitro</i> tests                                                                                             | ✓ Increased cell uptake by tumour cells and decreased recognition by macrophages                                                  | [35] | -    |

|                           |                                                                             |                                                                                                                                                            |                                     |                                |                                                                                                                                         |                                                                                                                          |                                                                                                                                         |      |      |
|---------------------------|-----------------------------------------------------------------------------|------------------------------------------------------------------------------------------------------------------------------------------------------------|-------------------------------------|--------------------------------|-----------------------------------------------------------------------------------------------------------------------------------------|--------------------------------------------------------------------------------------------------------------------------|-----------------------------------------------------------------------------------------------------------------------------------------|------|------|
|                           | cancer (S180) cell lines<br><br>S180 tumour-bearing mice<br><br>Intravenous | GMS<br><br>Liquid lipid: MCT<br><br>Surfactant: Kolliphor ELP and HS15<br><br>Functionalization: RBCm                                                      |                                     |                                | 0.095 ± 0.021<br><br>ZP<br>-29.56 ± 1.17 mV<br><br>%EE<br>93.44 ± 0.17%<br><br>Stability:<br>15 days                                    | <i>In vivo</i> :<br>Tumour-targeting effect and anti-tumour studies was performed in mice.                               | ✓ prolonged PTX blood circulation<br>✓ Increased the antitumour effect<br>✓ extended the survival period<br>✓ lower collateral effects. |      |      |
| PTX                       | U-87 cells                                                                  | (Synthetic lipids)<br><br>Solid lipid: Chol<br><br>Liquid lipid<br>Triolein<br>Soy lecithin<br><br>Surfactant: P-188<br><br>Functionalization: Transferrin | Emulsification-solvent evaporation  | PCS<br>Microscopy (TEM)<br>XRD | Size<br>205.4 ± 11 nm<br><br>PDI<br>Not informed<br><br>ZP<br>25.7 ± 6.22mV<br><br>%EE<br>91.8 ± 0.5%<br><br>Stability:<br>Not informed | Pharm. development<br><br><i>In vitro</i> tests                                                                          | ✓ Increased cytotoxicity<br>✓ Higher cellular uptake                                                                                    | [36] | [51] |
| Vincristine sulfate (VCR) | MCF-7 cells                                                                 | (Synthetic lipids)<br><br>Solid lipid: GMS<br><br>Liquid lipid: CT<br><br>Surfactants: SDS<br>Egg lecithin                                                 | Emulsion solvent evaporation method | DLS<br>Microscopy (TEM / CLSM) | Size<br>192 ± 4.41 nm<br><br>PDI<br>0.184 ± 0.05<br><br>ZP<br>26.3 ± 1.44 mV<br><br>%EE<br>33.28 ± 2.31%                                | Pharm. development<br><br><i>In vitro</i> tests<br><br><i>In vivo</i> : Pharmacokinetic in rats with oral administration | ✓ Improved cytotoxicity<br>✓ HA induced cell apoptosis.<br>✓ Superior cell uptake <i>in vitro</i><br>✓ Improved oral bioavailability    | [37] | [16] |

|  |  |                          |  |  |                            |  |  |  |  |
|--|--|--------------------------|--|--|----------------------------|--|--|--|--|
|  |  | Tween 80<br>CTAB         |  |  | Stability:<br>Not informed |  |  |  |  |
|  |  | Functionalization:<br>HA |  |  |                            |  |  |  |  |

## Alkylating agents

| Drug            | Tumour tested and route                                          | Composition                                                                                                                                                 | Preparation method             | Characterization        | Physical-chemical properties                                                                                                                              | Tests conducted                                                                                                                        | Main results                                                                                                           | Ref. | Ref. in the review |
|-----------------|------------------------------------------------------------------|-------------------------------------------------------------------------------------------------------------------------------------------------------------|--------------------------------|-------------------------|-----------------------------------------------------------------------------------------------------------------------------------------------------------|----------------------------------------------------------------------------------------------------------------------------------------|------------------------------------------------------------------------------------------------------------------------|------|--------------------|
| Cisplatin (CIS) | HeLa cells<br><br>HeLa mice-bearing xenograft<br><br>Intravenous | (Natural lipids)<br><br>Solid lipid: SA<br><br>Liquid lipid: Soybean oil<br><br>Surfactant: Tween-80<br>Soya lecithin<br><br>Functionalization: FA-PEG-DSPE | Emulsification method          | DLS                     | Size<br>$143.2 \pm 5.3$ nm<br><br>PDI<br>$0.15 \pm 0.02$<br><br>ZP<br>$25.7 \pm 2.3$ mV<br><br>%EE:<br>$87.5 \pm 3.2\%$<br><br>Stability:<br>Not informed | Pharm. Development<br><br><i>In vitro</i> tests<br><br><i>In vivo</i> :<br>Anti-tumour efficiency in mice                              | ✓ Superior cytotoxicity and tumour inhibition                                                                          | [38] | [60]               |
| CIS             | SKOV3 cells<br><br>SKOV3 cells in mice<br><br>Intravenous        | (Synthetic lipids)<br><br>Solid lipid: ATO<br>Precirol ATO 5<br><br>Liquid lipid: Miglyol 812<br><br>Surfactant:                                            | Sonication or ultra-sonication | DLS<br>Microscopy (TEM) | Size<br>$132.4 \pm 5.3$ nm<br><br>PDI<br>$0.158 \pm 0.015$<br><br>ZP<br>$-19.3 \pm 1.9$ mV<br><br>%EE:                                                    | Pharm. Development<br><br><i>In vitro</i> tests<br><br><i>In vivo</i> :<br>Pharmacokinetics, biodistribution and antitumour efficiency | ✓ Improved cytotoxicity and cellular uptake<br>✓ Sustained plasma retention until 48h<br>✓ Best tumour inhibition rate | [39] | -                  |



|                      |                                                  |                                                                                                                                                                                                          |                                   |                                                  |                                                                                                                                  |                    |                                                                                             |      |      |
|----------------------|--------------------------------------------------|----------------------------------------------------------------------------------------------------------------------------------------------------------------------------------------------------------|-----------------------------------|--------------------------------------------------|----------------------------------------------------------------------------------------------------------------------------------|--------------------|---------------------------------------------------------------------------------------------|------|------|
|                      |                                                  | Tween 80<br>Lecithin                                                                                                                                                                                     |                                   |                                                  | 82.6 ± 3.9%                                                                                                                      |                    |                                                                                             |      |      |
|                      |                                                  |                                                                                                                                                                                                          |                                   |                                                  | Stability:<br>Not informed                                                                                                       |                    |                                                                                             |      |      |
| Dacarbazine<br>(DZ)  | Not tested                                       | (Synthetic lipids)<br><br>Solid lipid:<br>Glyceryl palmitostearate<br>Isopropyl myristate<br><br>Liquid lipid:<br>TS<br>Polyethylene glycol<br>succinate<br><br>Surfactant:<br>P-188<br>Soybean lecithin | Sonication or<br>ultra-sonication | DLS<br>Microscopy<br>(TEM)                       | Size:<br>190 ± 10 nm<br><br>PDI:<br>0.2 ± 0.01<br><br>ZP:<br>Not informed<br><br>%EE:<br>98.5%<br><br>Stability:<br>Not informed | Pharm. development | NLC with high<br>encapsulation<br>efficiency                                                | [40] | [62] |
| Ifosfamide<br>(IFOS) | Not tested                                       | (Synthetic lipids)<br><br>Solid lipid:<br>GMO<br><br>Liquid lipid:<br>OA<br><br>Surfactant:<br>P-188<br><br>Functionalization:<br>Chitosan and Sodium<br>alginate                                        | Sonication or<br>ultra-sonication | DLS<br>Microscopy<br>(TEM)<br>FTIR<br>DSC<br>XRD | Size<br>223 nm<br><br>PDI<br>0.194 ± 0.025<br><br>ZP<br>-25 mV<br><br>%EE:<br>77%<br><br>Stability:<br>6 months                  | Pharm. Development | ✓ Enhanced NLC<br>stability<br>✓ High<br>entrapment<br>efficiency<br>✓ Sustained<br>release | [41] | [63] |
| IFOS                 | Dalton's ascitic lymphoma<br>(DAL) cells in mice | (Synthetic lipids)<br><br>Solid lipid:                                                                                                                                                                   | Sonication or<br>ultra-sonication | DLS                                              | Size<br>223 nm                                                                                                                   | <i>In vivo:</i>    | ✓ Increased IFOS<br>plasma<br>concentrations                                                | [42] | [18] |

|                        |                                       |                                                                                                                                                                |                                |                                |                                                                                                                               |                                                                                                                        |                                                                                                                                                                  |      |      |
|------------------------|---------------------------------------|----------------------------------------------------------------------------------------------------------------------------------------------------------------|--------------------------------|--------------------------------|-------------------------------------------------------------------------------------------------------------------------------|------------------------------------------------------------------------------------------------------------------------|------------------------------------------------------------------------------------------------------------------------------------------------------------------|------|------|
|                        | Oral route                            | GMO<br><br>Liquid lipid:<br>OA<br><br>Surfactant:<br>P-188<br><br>Functionalization:<br>Chitosan and Sodium alginate                                           |                                |                                | PDI<br>$0.194 \pm 0.025$<br><br>ZP<br>$-25 \text{ mV}$<br><br>%EE:<br>77%<br><br>Stability:<br>6 months                       | Pharmacokinetics study and Antitumour Activity                                                                         | and bioavailability.<br>✓ Oral administration as efficient as intravenous administration of IFOS suspension, but with less side effects                          |      |      |
| IFOS                   | Not tested                            | (Synthetic lipids)<br><br>Solid lipid:<br>GMO<br><br>Liquid lipid:<br>OA<br><br>Surfactant:<br>P-188<br><br>Functionalization:<br>Chitosan and Sodium alginate | Sonication or ultra-sonication | DLS                            | Size<br>223 nm<br><br>PDI<br>$0.194 \pm 0.025$<br><br>ZP<br>$-25 \text{ mV}$<br><br>%EE:<br>77%<br><br>Stability:<br>6 months | <i>In vivo</i> :<br>Toxicity after oral delivery in rat                                                                | ✓ No mortality<br>✓ No signs of behavioural changes or toxicity after oral administration of IFOS NLC<br>✓ Reduced severity of renal dysfunction induced by IFOS | [43] | [64] |
| Mechlorethamine (MCTN) | Myelogenous leukemia (K562) cell line | (Synthetic lipids)<br><br>Solid lipid:<br>ATO<br><br>Liquid lipid:<br>Miglyol 812<br><br>Surfactant:                                                           | Sonication or ultra-sonication | DLS<br>Microscopy (TEM)<br>DSC | Size<br>$105.92 \pm 1.04 \text{ nm}$<br><br>PDI<br>0.02<br><br>ZP<br>$-30.1 \pm 0.82 \text{ mV}$                              | Pharm. Development<br><br><i>In vitro</i> tests<br><br><i>In vivo</i> :<br>Pharmacokinetics study in rat by oral route | ✓ Improved cytotoxicity<br>✓ Increased MCT plasma concentration<br>✓ Greater absorption                                                                          | [44] | [17] |

|                    |                                                                     |                                                                                                                                                                  |                                                                |                             |                                                                                                                                    |                                                                                                                                                                                         |                                                                                                                                                                 |      |      |
|--------------------|---------------------------------------------------------------------|------------------------------------------------------------------------------------------------------------------------------------------------------------------|----------------------------------------------------------------|-----------------------------|------------------------------------------------------------------------------------------------------------------------------------|-----------------------------------------------------------------------------------------------------------------------------------------------------------------------------------------|-----------------------------------------------------------------------------------------------------------------------------------------------------------------|------|------|
|                    |                                                                     | P-188                                                                                                                                                            |                                                                |                             | %EE:<br>91.7 ± 1.20%                                                                                                               |                                                                                                                                                                                         |                                                                                                                                                                 |      |      |
|                    |                                                                     |                                                                                                                                                                  |                                                                |                             | Stability:<br>180 days                                                                                                             |                                                                                                                                                                                         |                                                                                                                                                                 |      |      |
| Temozolomide (TMZ) | Not tested                                                          | (Synthetic lipids)<br><br>Solid lipid:<br>Gelucire 44/14<br><br>Liquid lipid:<br>Trascutol<br><br>Surfactant:<br>Tween 80<br><br>Functionalization:<br>Vitamin E | High-pressure homogenization (HPH) followed by ultrasonication | PCS Microscopy (TEM)<br>DSC | Size<br>131.58 nm<br><br>PDI<br>0.177<br><br>ZP<br>15.21 ± 3.11 mV<br><br>%EE:<br>81.64 ± 3.71%<br><br>Stability:<br>Not informed  | Pharm. development<br><i>Ex Vivo</i> : Transport Study Across Nasal Mucosa<br><br><i>In vivo</i> : (Wistar rats) absorption and brain uptake/<br>Pharmacokinetic and Brain Distribution | ✓ Greater permeation through the nasal mucosa<br>✓ increased nose-to-brain drug delivery<br>✓ Long lasting (24h) effect<br>✓ Tween 80 enhanced drug penetration | [45] | [66] |
| TMZ                | <b>U87 MG</b> cells<br><br><b>U87 MG</b> in mice<br><br>Intravenous | (Synthetic lipids)<br><br>Solid lipid:<br>ATO<br><br>Liquid lipid:<br>Cremophor<br><br>Surfactant:<br>Tween-80<br>Soya lecithin                                  | Emulsification-solvent diffusion                               | DLS Microscopy (TEM)        | Size<br>121.4±5.6 nm<br><br>PDI<br>0.21±0.06<br><br>ZP<br>29.1±2.4 mV<br><br>%EE:<br>81.4 ± 3.7%<br><br>Stability:<br>Not informed | Pharm. Development<br><br><i>In vitro</i> tests<br><br><i>In vivo</i> :<br>Anti-tumour efficacy                                                                                         | ✓ Improved cytotoxicity<br>✓ High tumour regression rates                                                                                                       | [46] | [67] |
| TMZ                | Malignant glioma<br><br>Intravenous                                 | (Synthetic lipids)<br><br>Solid lipid:                                                                                                                           | Emulsification-solvent diffusion                               | DLS                         | Size<br>178.9 ± 2.7 nm                                                                                                             | Pharm. Development<br><br><i>In vitro</i> tests                                                                                                                                         | ✓ Higher cytotoxicity                                                                                                                                           | [47] | [68] |

|                      |                                                                                      |                                                                                                                                                                  |                                      |                            |                                                                                                                                                           |                                                                                                 |                                                                                                   |      |      |
|----------------------|--------------------------------------------------------------------------------------|------------------------------------------------------------------------------------------------------------------------------------------------------------------|--------------------------------------|----------------------------|-----------------------------------------------------------------------------------------------------------------------------------------------------------|-------------------------------------------------------------------------------------------------|---------------------------------------------------------------------------------------------------|------|------|
|                      |                                                                                      | ATO<br><br>Liquid lipid:<br>Cremophor ELP<br><br>Surfactant:<br>DDAB<br>Lecithin<br>Tween-80                                                                     |                                      |                            | PDI<br>$0.16 \pm 0.05$<br><br>ZP:<br>$22.8 \pm 2.8$ mV<br><br>%EE:<br>$82.7 \pm 2.5\%$<br><br>Stability<br>Not informed                                   | <i>In vivo</i> :<br>Gene transfection<br>analysis<br>Anti-tumour efficacy                       | ✓ Higher tumour<br>inhibition rates                                                               |      |      |
| TMZ                  | <b>U87 MG</b> cells<br><br><b>U87 MG</b> solid tumours in<br>mice<br><br>Intravenous | (Synthetic lipids)<br><br>Solid lipid:<br>ATO<br><br>Liquid lipid:<br>Cremophor<br><br>Surfactant:<br>Tween-80<br>Soya lecithin<br><br>Functionalization:<br>RGD | Emulsification-<br>solvent diffusion | DLS                        | Size<br>$118.3 \pm 2.6$ nm<br><br>PDI<br>$0.11 \pm 0.02$<br><br>ZP<br>$28.9 \pm 2.9$ mV<br><br>%EE:<br>$84.7 \pm 3.2\%$<br><br>Stability:<br>Not informed | Pharm. Development<br><br><i>In vitro</i> tests<br><br><i>In vivo</i> :<br>Anti-tumour efficacy | ✓ Significantly<br>higher<br>cytotoxicity<br><br>✓ Superior<br>tumour growth<br>inhibition        | [48] | [69] |
| Oxaliplatin<br>(OXA) | <b>HT-29</b> cells                                                                   | (Synthetic lipids)<br><br>Solid lipid:<br>ATO<br><br>Liquid lipid:<br>Miglyol 812<br><br>Surfactant:<br>Poloxamer                                                | Sonication or<br>ultra-sonication    | DLS<br>Microscopy<br>(SEM) | Size<br>~ 98nm<br><br>PDI<br>0.2<br><br>ZP<br>-11,4mV<br><br>%EE:<br>87%                                                                                  | Pharm. Development<br><br><i>In vitro</i> tests                                                 | ✓ Higher<br>inhibition of<br>cell<br>proliferation,<br>✓ Increased cell<br>death and<br>apoptosis | [49] | -    |

|  |  |                                  |  |  |                            |  |  |  |  |
|--|--|----------------------------------|--|--|----------------------------|--|--|--|--|
|  |  | Functionalization:<br>Naringenin |  |  | Stability:<br>Not informed |  |  |  |  |
|--|--|----------------------------------|--|--|----------------------------|--|--|--|--|

## Antitumour antibiotics

| Drug              | Tumour tested and route                                                    | Composition                                                                                         | Preparation method                 | Characterization        | Physical-chemical properties                                                                                                                                             | Tests conducted                                                                             | Main results                                                                        | Ref. | Ref. in the review |
|-------------------|----------------------------------------------------------------------------|-----------------------------------------------------------------------------------------------------|------------------------------------|-------------------------|--------------------------------------------------------------------------------------------------------------------------------------------------------------------------|---------------------------------------------------------------------------------------------|-------------------------------------------------------------------------------------|------|--------------------|
| Doxorubicin (DOX) | MCF-7 cells                                                                | (Synthetic lipids)<br><br>Solid lipid: SA<br><br>Liquid lipid: OA<br><br>Surfactant Lecithin P-188  | Emulsification-solvent evaporation | DLS<br>Microscopy (SEM) | Size<br>$134.0 \pm 2.3\text{nm}$<br><br>PDI<br>$0.265 \pm 0.031\text{nm}$<br><br>ZP<br>$-15 \pm 3.4$ to $-29.4 \pm 7.3$ mV<br><br>%EE<br>75<br><br>Stability:<br>60 days | Pharm. Development<br><br><i>In vitro</i> tests                                             | ✓ Improved cytotoxicity                                                             | [50] | -                  |
| DOX               | Murine breast cancer cell line (4T1)<br><br>4T1 in mice<br><br>Intravenous | (Natural lipids)<br><br>Solid lipid: ATO<br><br>Liquid lipid: Sesame oil<br><br>Surfactant Tween 80 | Sonication or ultra-sonication     | DLS                     | Size<br>93.76 nm<br><br>PDI<br>0.262<br><br>ZP<br>-29.9<br><br>%EE<br>96.54%                                                                                             | Pharm. Development<br><br><i>In vitro</i> tests<br><br><i>In vivo</i> : Antitumour activity | ✓ Improved cytotoxicity<br>✓ Improved antitumoral efficiency compared to other DDS. | [51] | [76]               |

|     |                                                                                                        |                                                                                                                                               |                                          |                                   |                                                                                                                                                                          |                                                                                                                                                   |                                                                                                              |      |      |
|-----|--------------------------------------------------------------------------------------------------------|-----------------------------------------------------------------------------------------------------------------------------------------------|------------------------------------------|-----------------------------------|--------------------------------------------------------------------------------------------------------------------------------------------------------------------------|---------------------------------------------------------------------------------------------------------------------------------------------------|--------------------------------------------------------------------------------------------------------------|------|------|
|     |                                                                                                        |                                                                                                                                               |                                          |                                   | Stability:<br>Not informed                                                                                                                                               |                                                                                                                                                   |                                                                                                              |      |      |
| DOX | <b>MDA-MB-231</b><br>and <b>4T1</b> cells<br><br><b>4T1</b> in mice<br><br>Intravenous                 | (Synthetic lipids)<br><br>Solid lipid:<br>ATO<br><br>Liquid lipid:<br>OA<br><br>Surfactant<br>Tween 80<br><br>Functionalization:<br>DHA<br>TS | Sonication or<br>ultra-sonication        | DLS                               | Size<br>$72.5 \pm 2.6\text{nm}$<br><br>PDI<br>$0.139 \pm 0.006$<br><br>ZP<br>$-21.7 \pm 2.2\text{ mV}$<br><br>%EE<br>$95.7 \pm 3.3\%$<br><br>Stability:<br>Not informed  | Pharm.<br>Development<br><br><i>In vivo</i> :<br>Antitumour<br>Activity,<br>Biodistribution,<br>histology and<br>toxicity                         | ✓ Improved<br>cytotoxicity<br>✓ Improved<br>antitumoral<br>efficiency with<br>reduced toxicity.              | [52] | [77] |
| DOX | <b>MDA-MB-231</b><br>and <b>4T1</b> cells<br><br><b>4T1</b> tumour-<br>bearing mice<br><br>Intravenous | (Synthetic lipids)<br><br>Solid lipid:<br>ATO<br><br>Liquid lipid:<br>MCT<br><br>Surfactant<br>Tween 80<br><br>Functionalization: TS          | Sonication or<br>ultra-sonication        | DLS<br>NTA<br>Microscopy<br>(AFM) | Size<br>$85.0 \pm 4.1\text{nm}$<br><br>PDI<br>$0.204 \pm 0.02$<br><br>ZP<br>$-41.0 \pm 2.6\text{ mV}$<br><br>%EE<br>$98.97 \pm 0.33\%$<br><br>Stability:<br>Not informed | Pharm.<br>Development<br><br><i>In vitro</i> tests<br><br><i>In vivo</i> :<br>Pharmacokinetics<br>, biodistribution<br>and antitumour<br>activity | ✓ Improved<br>cytotoxicity<br>DOX/TS synergy)<br>✓ Improved<br>bioavailability and<br>antitumour<br>activity | [53] | [78] |
| DOX | <b>A549</b> cells                                                                                      | (Synthetic lipids)<br><br>Solid lipid:<br>Precirol ATO 5<br><br>Liquid lipid:                                                                 | High-pressure<br>homogenization<br>(HPH) | DLS<br>Microscopy<br>(SEM)        | Size<br>86.2 nm<br><br>PDI<br>0.28                                                                                                                                       | Pharm.<br>Development<br><br><i>In vitro</i> tests                                                                                                | ✓ Improved<br>cytotoxicity<br>✓ Improved cellular<br>internalization<br>✓ Induced cellular<br>apoptosis      | [54] | -    |

|     |                                                                               |                                                                                                                                                                                         |                                           |                                                  |                                                                                                                                        |                                                                                                                                                                |                                                                                                                                                                                                 |      |      |
|-----|-------------------------------------------------------------------------------|-----------------------------------------------------------------------------------------------------------------------------------------------------------------------------------------|-------------------------------------------|--------------------------------------------------|----------------------------------------------------------------------------------------------------------------------------------------|----------------------------------------------------------------------------------------------------------------------------------------------------------------|-------------------------------------------------------------------------------------------------------------------------------------------------------------------------------------------------|------|------|
|     |                                                                               | Miglyol<br><br>Surfactant<br>Poloxamer 407<br><br>Functionalization:<br>SiC<br>RGD                                                                                                      |                                           |                                                  | ZP<br>−18.5 mV<br><br>%EE<br>56.04 ± 1.25%<br><br>Stability:<br>8 weeks                                                                |                                                                                                                                                                |                                                                                                                                                                                                 |      |      |
| DOX | <b>A549</b> cells<br><br><b>A549</b> solid tumours in mice<br><br>Intravenous | (Natural lipids)<br><br>Solid lipid:<br>Precirol ATO-5<br><br>Liquid lipid:<br>Olive oil<br>Lipoid S100<br><br>Surfactant<br>Tween-80<br>Lecithin<br><br>Functionalization:<br>pEGFP-N1 | Emulsification-<br>solvent<br>evaporation | DLS<br>Microscopy<br>(TEM)                       | Size<br>198.2 ± 3.1nm<br><br>PDI<br>0.13 ± 0.02<br><br>ZP<br>18.9 ± 2.6 mV<br><br>%EE<br>86.7 ± 2.7%<br><br>Stability:<br>Not informed | Pharm.<br>Development<br><br><i>In vitro</i> tests<br><br><i>In vivo</i> :<br>Gene transfection<br>analysis and<br>antitumour effect<br>in mice                | ✓ Improve gene<br>transfection<br>efficiency of the<br>vector<br>✓ Improved efficacy<br>on solid cancer                                                                                         | [55] | [81] |
| DOX | <b>4T1</b> cells<br><br><b>4T1</b> tumour-bearing mice<br><br>Intravenous     | (Synthetic lipids)<br><br>Solid lipid:<br>ATO<br><br>Liquid lipid:<br>Docosahexaenoic<br>triglyceride<br><br>Surfactant:<br>Tween 80<br><br>Functionalization:                          | Sonication or<br>ultra-sonication         | DLS<br>NTA<br>Microscopy<br>(TEM)<br>DSC<br>SAXS | Size<br>85 ± 3 nm<br><br>PDI<br>0.22 ± 0.01<br><br>ZP<br>− 41 ± 1 mV<br><br>%EE<br>81 ± 2%<br><br>Stability:                           | Pharm.<br>Development<br><br><i>In vitro</i> tests<br><br><i>In vivo</i> :<br>Evaluation of<br>antitumour<br>activity and<br>toxicity<br>evaluation in<br>mice | ✓ DOX, DHA, and<br>TS synergistic<br>effects<br>✓ Increased cellular<br>uptake<br>✓ Improved tumour<br>inhibition and<br>reduced mortality,<br>metastasis and<br>toxicity in liver<br>and heart | [56] | [80] |

|     |                                                                           |                                                                                                                                                      |                                    |                               |                                                                                                                                          |                                                                                                                              |                                                                                                                    |      |      |
|-----|---------------------------------------------------------------------------|------------------------------------------------------------------------------------------------------------------------------------------------------|------------------------------------|-------------------------------|------------------------------------------------------------------------------------------------------------------------------------------|------------------------------------------------------------------------------------------------------------------------------|--------------------------------------------------------------------------------------------------------------------|------|------|
|     |                                                                           | DHA TS                                                                                                                                               |                                    |                               | Not informed                                                                                                                             |                                                                                                                              |                                                                                                                    |      |      |
| DOX | <b>4T1</b> cells<br><br><b>4T1</b> tumour-bearing mice<br><br>Intravenous | (Synthetic lipids)<br><br>Solid lipid: Cholesteryl ester Triolein<br><br>Liquid lipid: OA<br><br>Surfactant: CTAB<br><br>Functionalization: ApoB-100 | Emulsification-solvent evaporation | DLS Microscopy (CLSM and TEM) | Size<br>129.0 ± 2.4 nm<br><br>PDI<br>0.19 ± 0.02<br><br>ZP<br>- 21 ± 0.82 mV<br><br>%EE<br>91.4 ± 1.9%<br><br>Stability:<br>Not informed | Pharm. Development<br><br><i>In vitro</i> tests<br><br><i>In vivo</i> : Bio-distribution, antitumour efficiency and toxicity | ✓ Higher tumour cell uptake and tumour cell inhibition<br><br>✓ Improved in vivo efficacy with lower toxicity      | [57] | [79] |
| DOX | <b>B16F10</b> cells                                                       | (Synthetic lipids)<br><br>Solid lipid: ATO<br><br>Liquid lipid: Miglyol 812N<br><br>Surfactant: Poloxamer<br><br>Functionalization: Static           | Sonication or ultra-sonication     | DLS Microscopy (SEM)          | Size<br>67–115 nm<br><br>PDI<br>0.24<br><br>ZP<br>30 mV<br><br>%EE<br>Not informed<br><br>Stability:<br>Not informed                     | Pharm. Development<br><br><i>In vitro</i> tests                                                                              | ✓ Synergistic activity<br><br>✓ Inhibition of STAT3 signalling/ downregulation of antiapoptotic Bcl-2 family genes | [58] | -    |
| DOX | <b>MDA-MB-231</b> cells                                                   | (Synthetic lipids)<br><br>Solid lipid: Gelucire Cetyl palmitate                                                                                      | Sonication or ultra-sonication     | DLS and ELS Microscopy (TEM)  | Size<br>281 ± 18 nm<br><br>PDI<br>0.15 ± 0.04                                                                                            | Pharm. Development<br><br><i>In vitro</i> tests                                                                              | ✓ Improved cytotoxicity and cellular uptake                                                                        | [59] | -    |



|     |                                                             |                                                                                                                                               |                                |                            |                                                                                                                      |                                                                                                                                   |                                                                                                                                                                                  |      |      |
|-----|-------------------------------------------------------------|-----------------------------------------------------------------------------------------------------------------------------------------------|--------------------------------|----------------------------|----------------------------------------------------------------------------------------------------------------------|-----------------------------------------------------------------------------------------------------------------------------------|----------------------------------------------------------------------------------------------------------------------------------------------------------------------------------|------|------|
|     |                                                             | Liquid lipid:<br>OA<br>Miglyol<br><br>Surfactant:<br>Polysorbate 80<br><br>Functionalization:<br>PEG-FA                                       |                                |                            | ZP<br>– 28.0 ± 0.9 mV<br><br>%EE<br>66 ± 8%<br><br>Stability:<br>42 days                                             |                                                                                                                                   |                                                                                                                                                                                  |      |      |
| DOX | MCF-7 and MCF7/ADR cells                                    | (Synthetic lipids)<br><br>Solid lipid:<br>ATO<br><br>Liquid lipid:<br>OA<br><br>Surfactant:<br>Tween 80<br><br>Functionalization:<br>DHA<br>. | Sonication or ultra-sonication | DLS Microscopy (CLSM)      | Size<br>76–86 nm<br><br>PDI<br>0.22<br><br>ZP<br>–23 and –36 mV<br><br>%EE<br>~100<br><br>Stability:<br>Not informed | <i>In vitro</i> tests<br><br>Spheroids:<br>Cytotoxicity<br>Penetration                                                            | ✓ Improved cytotoxicity and penetration in spheroids                                                                                                                             | [60] | [74] |
| DOX | 4T1 cells<br><br>4T1 tumour-bearing mice<br><br>Intravenous | (Synthetic lipids)<br><br>Solid lipid:<br>ATO<br><br>Liquid lipid:<br>OA<br>DHA<br><br>Surfactant<br>Tween 80<br><br>Functionalization:       | Sonication or ultra-sonication | DLS Microscopy (SEM / TEM) | Size<br>128 ± 1 nm<br><br>PDI<br>0.098<br><br>ZP<br>5 ± 3 mV<br><br>%EE<br>Not informed<br><br>Stability:            | Pharm. Development<br><br><i>In vitro</i> tests<br><br><i>In vivo</i> :<br>Tumour growth inhibition, toxicity and pharmacokinetic | ✓ Improved pharmacokinetics (higher plasma concentration)<br>✓ lower accumulation in the liver and higher accumulation in tumour<br>✓ Enhanced effect (tumour growth inhibition) | [61] | [75] |

|     |              |                                                                                                                                                               |                                           |                                           |                                                                                                                              |                                                                                                       |                                                                                               |      |      |
|-----|--------------|---------------------------------------------------------------------------------------------------------------------------------------------------------------|-------------------------------------------|-------------------------------------------|------------------------------------------------------------------------------------------------------------------------------|-------------------------------------------------------------------------------------------------------|-----------------------------------------------------------------------------------------------|------|------|
|     |              | LbL-PEG                                                                                                                                                       |                                           |                                           | 14 days                                                                                                                      |                                                                                                       |                                                                                               |      |      |
| DOX | MCF-7 cells  | (Synthetic lipids)<br><br>Solid lipid:<br>ATO<br><br>Liquid lipid:<br>Miglyol 812N<br><br>Surfactant:<br>Poloxamer 407<br><br>Functionalization:<br>Vitamin D | Sonication or<br>ultra-sonication         | DLS<br>Microscopy<br>(SEM)<br>FTIR        | Size<br>87.5 nm<br><br>PDI<br>0.24<br><br>ZP<br>-12 mV<br><br>%EE<br>Not informed<br><br>Stability:<br>Not informed          | Pharm.<br>Development<br><br><i>In vitro</i> tests                                                    | ✓ Improved<br>cytotoxicity<br>✓ Increased<br>percentage of<br>MCF-7 cells in<br>sub-G1 arrest | [62] | -    |
| DOX | PC-3 cells   | (Natural lipids)<br><br>Solid lipid:<br>GMS<br><br>Liquid lipid:<br>Soybean oil<br><br>Surfactant:<br>Lecithin<br>PEG-40-St<br>DSPE-PEG                       | Emulsification-<br>solvent<br>evaporation | DLS<br>Microscopy<br>(TEM)                | Size<br>170 nm<br><br>PDI<br>Not informed<br><br>ZP<br>-14.8 mV<br><br>%EE<br>74.18 ± 0.3%<br><br>Stability:<br>Not informed | Pharm.<br>Development<br><br><i>In vitro</i> tests<br><br><i>In vivo</i> :<br>Oral<br>bioavailability | ✓ Improved<br>cytotoxicity<br>✓ Improved DOX<br>bioavailability                               | [63] | [19] |
| DOX | HCT116 cells | (Synthetic lipids)<br><br>Solid lipid:<br>SA<br>GMS                                                                                                           | High-pressure<br>homogenization<br>(HPH)  | DLS<br>Microscopy<br>(TEM)<br>DSC<br>SAXS | Size<br>168 – 173 nm<br><br>PDI<br>was less than 0.2<br><br>ZP                                                               | Pharm.<br>Development<br><br><i>In vitro</i> tests                                                    | ✓ Improved<br>cytotoxicity<br>✓ Higher cellular<br>uptake                                     | [64] | -    |

|                      |                                                                                                                 |                                                                                                                                                                                 |                                           |                                                  |                                                                                                                                                           |                                                                                                                                                                                                                                                                                                                                    |                                                                                                                                          |              |              |
|----------------------|-----------------------------------------------------------------------------------------------------------------|---------------------------------------------------------------------------------------------------------------------------------------------------------------------------------|-------------------------------------------|--------------------------------------------------|-----------------------------------------------------------------------------------------------------------------------------------------------------------|------------------------------------------------------------------------------------------------------------------------------------------------------------------------------------------------------------------------------------------------------------------------------------------------------------------------------------|------------------------------------------------------------------------------------------------------------------------------------------|--------------|--------------|
|                      |                                                                                                                 | Liquid lipid:<br>OA<br>MCT<br><br>Surfactant<br>P-188                                                                                                                           |                                           |                                                  | 30 mV<br><br>%EE<br>97.80%<br><br>Stability:<br>30 days                                                                                                   |                                                                                                                                                                                                                                                                                                                                    |                                                                                                                                          |              |              |
| Pirarubicin<br>(THP) | <b>4T1</b> cell<br><br>Mice bearing<br><b>4T1</b><br>Intravenous                                                | (Synthetic lipids)<br><br>Solid lipid:<br>Structured<br>triglyceride<br><br>Liquid lipid:<br>OA<br><br>Surfactant:<br>Solutol HS 15<br>Lecithin<br><br>Functionalization:<br>TS | High-pressure<br>homogenization<br>(HPH)  | DLS<br>Microscopy<br>(TEM / CLSM)                | Size<br>$112 \pm 2.8$ nm<br><br>PDI<br>$0.18 \pm 0.02$<br><br>ZP<br>$-17.5 \pm 1.3$ mV<br><br>%EE<br>$90.01 \pm 3.03\%$<br><br>Stability:<br>Not informed | Pharm.<br>Development<br><br><i>In vitro</i> tests<br><br><i>In vivo</i> :<br>Distribution and<br>pharmacokinetic<br>studies, flow<br>cytometry<br>(Analysis of<br>Immune cells and<br>cytokine Assay),<br>histological and<br>immunohistoche<br>mical analysis,<br>antitumour<br>efficacy<br>in mice Co-<br>administering<br>iRGD | ✓ Higher levels of<br>tumour<br>distribution,<br>✓ enhanced tumour<br>cell death<br>✓ increased immune-<br>mediated<br>antitumour effect | [65]         | [82]         |
| Irinotecan<br>(Ir)   | <b>HT-29</b> and<br><b>Colo-320</b> cell<br>lines<br><br>Ehrlich's ascites<br>tumour in mice<br><br>Intravenous | (Synthetic lipids)<br><br>Solid lipid:<br>ATO<br><br>Liquid lipid:<br>Capmul MCM                                                                                                | Emulsification-<br>solvent<br>evaporation | DLS<br>Microscopy<br>(CLSM / TEM)<br>FTIR<br>NMR | Size<br>$386 \pm 2.2$ nm<br><br>PDI<br>Not informed<br><br>ZP<br>$19.7 \pm 1.2$ mV                                                                        | Pharm.<br>Development<br><br><i>In vitro</i> tests<br><br><i>In vivo</i> :<br>biodistribution<br>studies                                                                                                                                                                                                                           | ✓ Low macrophage<br>engulfment<br>✓ Enhanced uptake<br>and prolonged<br>accumulation in in<br>vivo                                       | [66]<br>[67] | [84]<br>[85] |

|                    |                                                                                                                                         |                                                                                                                                                                          |                                                   |             |                                                                                                                                            |                                                                                                     |                                                                              |      |      |
|--------------------|-----------------------------------------------------------------------------------------------------------------------------------------|--------------------------------------------------------------------------------------------------------------------------------------------------------------------------|---------------------------------------------------|-------------|--------------------------------------------------------------------------------------------------------------------------------------------|-----------------------------------------------------------------------------------------------------|------------------------------------------------------------------------------|------|------|
|                    |                                                                                                                                         | Surfactant<br>P-188 Deoxycholate<br>Lecithin                                                                                                                             |                                                   |             | %EE<br>98.22 ± 2.06%                                                                                                                       | and antitumour<br>efficiency                                                                        | ✓ Enhanced<br>antitumoral<br>activity<br>✓ Low (hematologic)<br>side effects |      |      |
|                    |                                                                                                                                         | Functionalization:<br>HA                                                                                                                                                 |                                                   |             | Stability:<br>Not informed                                                                                                                 |                                                                                                     |                                                                              |      |      |
| Etoposide<br>(ETP) | Human gastric<br>cancer<br>( <b>SGC7901</b> ) cell<br>line<br><br>Mice bearing<br><b>SGC7901</b> cells<br>xenografts<br><br>Intravenous | (Synthetic lipids)<br><br>Solid lipid:<br>GMS<br><br>Liquid lipid:<br>OA<br>SPC<br><br>Surfactant:<br>DOTAP<br>Lecithin                                                  | Solvent injection<br>(or solvent<br>displacement) | DLS         | Size<br>91.3 ± 2.8 nm<br><br>PDI<br>0.12 ± 0.03<br><br>ZP<br>23.1 ± 3.3 mV<br><br>%EE<br>78.4 ± 3.6%<br><br>Stability<br>Not informed      | Pharm.<br>Development<br><br><i>In vitro</i> tests<br><br><i>In vivo</i> :<br>antitumour<br>effects | ✓ Improved<br>cytotoxicity<br>✓ Improved anti-<br>tumour efficacy            | [68] | [87] |
| ETP                | Acute<br>myelogenous<br>leukaemia<br>( <b>K562</b> ) cell line                                                                          | (Synthetic lipids)<br><br>Solid lipid:<br>Cetyl palmitate<br><br>Liquid lipid:<br>Octyldodecanol<br><br>Surfactant:<br>P-188<br>Lecithin<br><br>Functionalization:<br>Tf | Emulsification-<br>solvent diffusion              | DLS<br>FTIR | Size<br>171.0 ± 1.4 nm<br><br>PDI<br>0.287 ± 0.043<br><br>ZP<br>23.3± 0.6 mV<br><br>%EE<br>74.07 ± 0.78%<br><br>Stability:<br>Not informed | Pharm.<br>Development<br><br><i>In vitro</i> tests                                                  | ✓ Improved<br>cytotoxicity                                                   | [69] | -    |

|     |                                                                                                     |                                                                                                                                                      |                                             |                                     |                                                                                                                                                              |                                                                                                                                 |                                                                                                                              |      |      |
|-----|-----------------------------------------------------------------------------------------------------|------------------------------------------------------------------------------------------------------------------------------------------------------|---------------------------------------------|-------------------------------------|--------------------------------------------------------------------------------------------------------------------------------------------------------------|---------------------------------------------------------------------------------------------------------------------------------|------------------------------------------------------------------------------------------------------------------------------|------|------|
| ETP | Human Burkitt's lymphoma ( <b>Raji</b> ) cell line<br><br>Lymphoma model in mice<br><br>Intravenous | (Synthetic lipids)<br><br>Solid lipid: GMS<br><br>Liquid lipid: Miglyol 812N<br><br>Surfactant CTAB<br><br>Functionalization: HA<br>TAT<br>TS        | Solvent injection (or solvent displacement) | DLS Microscopy (TEM)<br>FTIR<br>NMR | Size<br>$125.2 \pm 7.1$ nm<br><br>PDI<br>$0.27 \pm 0.07$<br><br>ZP<br>$21.3 \pm 3.4\%$<br><br>%EE<br>$90.74 \pm 3.08\%$<br><br>Stability:<br>Not informed    | Pharm. Development<br><br><i>In vitro</i> tests<br><br><i>In vivo</i> : Tissue biodistribution<br>Antitumour efficacy           | ✓ Improved cytotoxicity and cellular uptake<br>✓ Improved antitumour efficacy with low side-effects                          | [70] | -    |
| ETP | <b>A549</b> cells                                                                                   | (Natural lipids)<br><br>Solid lipid: GMS<br><br>Liquid lipid: Soybean oil<br><br>Surfactant: Lecithin<br><br>Functionalization: DSPE-PE or PEG-40-st | Emulsification-solvent evaporation          | PCS Microscopy (TEM)                | Size<br>$125.9\text{--}91.2$ nm<br><br>PDI<br>< 0.2<br><br>ZP<br>$28.49$ to $15.34$ mV<br><br>%EE<br>$57.9\text{--}89.7\%$<br><br>Stability:<br>Not informed | Pharm. Development<br><br><i>In vitro</i> tests<br><br><i>In vivo</i> : Pharmacokinetic study in rats and Intestinal absorption | ✓ Improved cytotoxicity<br>✓ Superior absorption by the guts<br>✓ Improved bioavailability in rats after oral administration | [71] | [86] |
| ETP | <b>CT26</b> , <b>SGC7901</b> and <b>NCI-H209</b> cells<br><br>Gastric                               | (Synthetic lipids)<br><br>Solid lipid: GMS<br><br>Liquid lipid: OA                                                                                   | Solvent injection (or solvent displacement) | PCS Microscopy (TEM)                | Size<br>$120.91 \pm 3.59$ nm<br><br>PDI<br>$0.139 \pm 0.026$<br><br>ZP                                                                                       | Pharm. Development<br><br><i>In vitro</i> tests<br><br><i>In vivo</i> :                                                         | ✓ Selective delivery to human gastric cancer cells<br>✓ Enhancement of the antitumour capacity                               | [72] | [88] |

|                 |                                                                |                                                                                                                             |                         |                                |                                                                                                                      |                                                                    |                         |      |   |  |
|-----------------|----------------------------------------------------------------|-----------------------------------------------------------------------------------------------------------------------------|-------------------------|--------------------------------|----------------------------------------------------------------------------------------------------------------------|--------------------------------------------------------------------|-------------------------|------|---|--|
|                 | tumour-bearing mice ( <b>SGC7901</b> cells)<br><br>Intravenous | Surfactant:<br>DOTAP<br>Lecithin<br><br>Functionalization:<br>FA-PEG-DSPE                                                   |                         |                                | 21.3 mV<br><br>%EE<br>83.86 ± 3.21%<br><br>Stability:<br>24 h                                                        | Tissues distribution assay and antitumour effects                  | ✓                       |      |   |  |
| Topotecan (TPT) | <b>B16F10</b> cells                                            | (Synthetic lipids)<br><br>Solid lipid:<br>SA<br><br>Liquid lipid:<br>OA<br><br>Surfactant:<br>Lecithin<br>Taurodeoxycholate | Microemulsion technique | DLS<br>NTA<br>Microscopy (AFM) | Size<br>183.2 nm<br><br>PDI<br>0.3<br><br>ZP<br>75.9 mV<br><br>%EE<br>Not informed<br><br>Stability:<br>Not informed | Pharm. Development<br><br><i>In vitro</i> tests<br>Skin permeation | ✓ Enhanced cytotoxicity | [73] | - |  |

### Codelivery of conventional AA by NLC

| Drug                    | Tumour tested and route                                   | Composition                                                          | Preparation method                 | Characterization                       | Physical-chemical properties                      | Tests conducted                                                         | Main results                                                         | Ref. | Ref. in the review |
|-------------------------|-----------------------------------------------------------|----------------------------------------------------------------------|------------------------------------|----------------------------------------|---------------------------------------------------|-------------------------------------------------------------------------|----------------------------------------------------------------------|------|--------------------|
| DOX<br><br>+<br><br>PTX | <b>A549</b> cells<br><br>Pulmonary carcinoma<br><br>Nasal | (Synthetic lipids)<br><br>Solid lipid:<br>SA<br>GMS<br>Soya lecithin | Emulsification-solvent evaporation | DNPA<br>Microscopy (SEM)<br>DSC<br>XRD | Size<br>394.1 ± 5.6 nm<br><br>PDI<br>0.180 ± 0.02 | Pharm. Development<br><br><i>In vitro</i> tests<br><br><i>In vivo</i> : | ✓ Enhanced retention and drug accumulation in the lung without signs | [74] | [20]               |

|                                  |                                                                                               |                                                                                                      |                                      |     |                                                                                                                                                                                                |                                                                                                            |                                                                                                                                |      |      |
|----------------------------------|-----------------------------------------------------------------------------------------------|------------------------------------------------------------------------------------------------------|--------------------------------------|-----|------------------------------------------------------------------------------------------------------------------------------------------------------------------------------------------------|------------------------------------------------------------------------------------------------------------|--------------------------------------------------------------------------------------------------------------------------------|------|------|
|                                  |                                                                                               | Liquid lipid:<br>OA<br><br>Surfactant<br>Cremophor EL                                                |                                      |     | ZP<br>-18.17 ± 2.3 mV<br><br>%EE<br>79.87 ± 3.32%<br><br>Stability<br>Not informed                                                                                                             | Lung<br>deposition,<br>bio-distribution<br>(lungs, liver,<br>kidney, and<br>spleen) and<br>lungs histology | of tissue<br>abnormality                                                                                                       |      |      |
| DOX<br><br>+<br><br>PTX          | NCL-H460 cells<br><br>Mice models<br>grafting NCL-H460<br>cells<br><br>Intravenous            | (Synthetic lipids)<br><br>Solid lipid:<br>ATO<br><br>Liquid lipid:<br>OA<br><br>Surfactant<br>DOTMA  | Sonication or<br>ultra-sonication    | DLS | Size<br>129.3 ± 4.2 nm<br><br>PDI<br>0.18 ± 0.05<br><br>ZP<br>26.6 ± 3.2 mV<br><br>% EE <sub>DOX</sub><br>83.7 ± 4.1<br><br>% EE <sub>PTX</sub><br>81.9 ± 4.4<br><br>Stability<br>Not informed | Pharm.<br>Development<br><br><i>In vitro</i> tests<br><br><i>In vivo</i> :<br>Antitumour<br>efficiency     | ✓ Improved<br>cytotoxicity<br>✓ Improved<br>efficacy<br>✓ Synergistic<br>DTX-PTX<br>effects<br>✓ Lower<br>systemic<br>toxicity | [75] | [92] |
| DOX<br><br>/<br><br>PTX<br><br>* | MCF-7, SKOV3<br>cells and their<br>multidrug resistant<br>(MCF-7/ADR and<br>SKOV3-TR30) cells | (Synthetic lipids)<br><br>Solid lipid:<br>GMS<br><br>Liquid lipid:<br>OA<br><br>Surfactant:<br>P-188 | Emulsification-<br>solvent diffusion | DLS | Size<br>306.3 ± 40.1 nm<br><br>PDI<br>0.325 ± 0.022<br><br>ZP<br>-32.1 ± 2.5 mV<br><br>%EE<br>67.05 ± 2.60%                                                                                    | Pharm.<br>Development<br><br><i>In vitro</i> tests                                                         | ✓ Improved<br>cytotoxicity<br>and cellular<br>uptake                                                                           | [76] | -    |

|                         |                                                                   |                                                                                                                                     |                                           |                                        |                                                                                                                                                                                                                 |                                                                                                                                                               |                                                                                                                                                                          |      |      |
|-------------------------|-------------------------------------------------------------------|-------------------------------------------------------------------------------------------------------------------------------------|-------------------------------------------|----------------------------------------|-----------------------------------------------------------------------------------------------------------------------------------------------------------------------------------------------------------------|---------------------------------------------------------------------------------------------------------------------------------------------------------------|--------------------------------------------------------------------------------------------------------------------------------------------------------------------------|------|------|
|                         |                                                                   | Functionalization:<br>FA–SA                                                                                                         |                                           |                                        | Stability<br>Not informed                                                                                                                                                                                       |                                                                                                                                                               |                                                                                                                                                                          |      |      |
| DOX<br><br>+<br><br>PTX | <b>MCF-7/ADR</b> cells                                            | (Synthetic lipids)<br><br>Solid lipid:<br>SA<br><br>Liquid lipid:<br>SPC<br><br>Surfactant:<br>CTAB<br><br>Functionalization:<br>FA | Emulsification-<br>solvent<br>evaporation | DLS<br>Microscopy (TEM)<br>DSC<br>FTIR | Size<br>$196 \pm 2.5$ nm<br><br>PDI<br>$0.214 \pm 0.04$<br><br>ZP<br>$23.4 \pm 0.3$ mV<br><br>%EE <sub>DOX</sub><br>$89.6 \pm 0.5$<br><br>%EE <sub>PTX</sub><br>$88.3 \pm 0.2$<br><br>Stability<br>Not informed | Pharm.<br>Development<br><br><i>In vitro</i> tests                                                                                                            | ✓ Improved<br>cytotoxicity<br>and synergistic<br>effect of drug<br>combination                                                                                           | [77] | -    |
| DOX<br><br>+<br><br>PTX | Glioma stem cells<br>(CD133+) <b>U87</b> cells<br><br>Intravenous | (Synthetic lipids)<br><br>Solid lipid:<br>ATO<br><br>Liquid lipid:<br>OA<br>SPC<br><br>Surfactant:<br>DOTMA<br>Lecithin<br><br>.    | Sonication or<br>ultra-sonication         | DLS<br>Microscopy (TEM)                | Size<br>$122.83 \pm 1.97$<br>nm<br><br>PDI<br>$0.31 \pm 0.04$<br><br>ZP<br>$18.64 \pm 1.46$ mV<br><br>%EE <sub>DOX</sub><br>$66.45 \pm 4.02$<br><br>%EE <sub>PTX</sub><br>$62.96 \pm 3.38$                      | Pharm.<br>Development<br><br><i>In vitro</i> tests<br><br><i>In vivo</i> :<br>tumour<br>progression;<br>Immunohistoc<br>hemistry;<br>Biochemical<br>analysis. | ✓ Inhibitory<br>effect on<br>colony<br>formation<br><br>✓ Suppression of<br>proliferation<br>and induced<br>apoptosis by<br>blocking the<br>PI3K/Akt/mT<br>OR signalling | [78] | [93] |



|                         |                                                                                                                    |                                                                                                       |                                    |     |                                                                                                                                                                                                 |                                                                                                           |                                                                                                                                                                   |      |      |
|-------------------------|--------------------------------------------------------------------------------------------------------------------|-------------------------------------------------------------------------------------------------------|------------------------------------|-----|-------------------------------------------------------------------------------------------------------------------------------------------------------------------------------------------------|-----------------------------------------------------------------------------------------------------------|-------------------------------------------------------------------------------------------------------------------------------------------------------------------|------|------|
|                         |                                                                                                                    |                                                                                                       |                                    |     | Stability<br>Not informed                                                                                                                                                                       |                                                                                                           |                                                                                                                                                                   |      |      |
| DOX<br><br>+<br><br>CIS | <b>MCF-7 and MCF-7/ADR cells</b><br><br>MCF-7/ADR tumour-bearing mice models<br><br>Intravenous                    | (Synthetic lipids)<br><br>Solid lipid: SA<br><br>Liquid lipid: SPC<br><br>Surfactant: DDAB            | Emulsification-solvent evaporation | PCS | Size<br>108.3 ± 2.3 nm<br><br>PDI<br>Not informed<br><br>ZP<br>16.4 ± 1.6 mV<br><br>%EE <sub>DOX</sub><br>89.5 ± 3.7%<br><br>%EE <sub>CIS</sub><br>86.7 ± 2.8%<br><br>Stability<br>Not informed | Pharm. Development<br><br><i>In vitro</i> tests<br><br><i>In vivo</i> : Anti-tumour efficacy              | ✓ Improved cytotoxicity<br>✓ Efficient on DOX-resistant MCF-7 cells<br>✓ Improved tumour concentration than in the heart and kidney<br>✓ Higher tumour inhibition | [79] | [94] |
| DOX<br><br>+<br><br>VCR | Diffuse large B-cell lymphoma (DLBCL) Cell lines ( <b>LY1</b> )<br><br><b>LY1</b> cells in mice<br><br>Intravenous | (Synthetic lipids)<br><br>Solid lipid: ATO<br><br>Liquid lipid: Cremophor ELP<br><br>Surfactant: DDBA | Microemulsion technique            | DLS | Size<br>95.8 ± 2.1 nm<br><br>PDI<br>Not informed<br><br>ZP<br>21.3 ± 2.8 mV<br><br>%EE <sub>DOX</sub><br>87.9 ± 2.4<br><br>%EE <sub>VCR</sub><br>83.3 ± 2.1<br><br>Stability<br>Not informed    | Pharm. Development<br><br><i>In vitro</i> tests<br><br><i>In vivo</i> : <i>Animal</i> Antitumour efficacy | ✓ High anti-tumour activity against lymphoma cells<br>✓ DOX-VCR synergistic effect                                                                                | [80] | [95] |

|                                             |                                                                                      |                                                                                                                                                                                    |                                                |                         |                                                                                                                                                                                                                                                                     |                                                                                                            |                                                                                                                       |      |      |
|---------------------------------------------|--------------------------------------------------------------------------------------|------------------------------------------------------------------------------------------------------------------------------------------------------------------------------------|------------------------------------------------|-------------------------|---------------------------------------------------------------------------------------------------------------------------------------------------------------------------------------------------------------------------------------------------------------------|------------------------------------------------------------------------------------------------------------|-----------------------------------------------------------------------------------------------------------------------|------|------|
| DOX<br><br>+<br><br>GEM<br><br>+<br><br>VCR | <b>Raji</b> cells<br><br><b>Raji</b> cells in mouse<br><br>Intravenous               | (Synthetic lipids)<br><br>Solid lipid:<br>Precirol ATO 5<br><br>Liquid lipid:<br>PVA<br><br>Surfactant:<br>Lecithin                                                                | Solvent injection<br>(or solvent displacement) | DLS<br>Microscopy (TEM) | Size<br>$112 \pm 5.7$ nm<br><br>PDI<br>$0.187 \pm 0.051$<br><br>ZP<br>$-39.7 \pm 4.1$ mV<br><br>%EE <sub>DOX</sub><br>$86.1 \pm 2.7\%$<br><br>%EE <sub>GEM</sub><br>$86.8 \pm 3.1\%$<br><br>%EE <sub>VCR</sub><br>$89.2 \pm 2.9\%$<br><br>Stability<br>Not informed | Pharm.<br>Development<br><br><i>In vitro</i> tests<br><br><i>In vivo</i> :<br>Efficacy,<br>biodistribution | ✓ Enhanced cytotoxicity<br>✓ Low drug concentration to heart and kidney<br>✓ Better antitumour therapeutic efficiency | [81] | [96] |
| DOX<br><br>+<br><br>Baicalein (BCL)         | <b>MCF-7/ADR</b> cell<br><br><b>MCF-7/ADR</b> tumour-bearing mice<br><br>Intravenous | (Synthetic lipids)<br><br>Solid lipid:<br>SA<br>Precirol ATO 5<br>SPC<br><br>Liquid lipid:<br>Cremophor ELP<br><br>Surfactant:<br>Lecithin<br>DDAB<br><br>Functionalization:<br>HA | Emulsification-solvent evaporation             | DLS                     | Size<br>$103.5 \pm 2.2$ nm<br><br>PDI<br>Not informed<br><br>ZP<br>$12.6 \pm 1.2$ mV<br><br>%EE <sub>BCL</sub><br>$90.8 \pm 1.7\%$<br><br>%EE <sub>DOX</sub><br>$91.5 \pm 1.8\%$<br><br>Stability:<br>Not informed                                                  | Pharm.<br>Development<br><br><i>In vitro</i> tests<br><br><i>In vivo</i> :<br>anti-tumour efficacy         | ✓ Improved cytotoxicity with synergistic effect<br>✓ Improved antitumour efficacy with reduced systemic toxicity      | [82] | [97] |

|                              |                                                                                                                 |                                                                                                                                                                         |                                   |                                        |                                                                                                                                                                                              |                                                                                                      |                                                                                                                             |      |       |
|------------------------------|-----------------------------------------------------------------------------------------------------------------|-------------------------------------------------------------------------------------------------------------------------------------------------------------------------|-----------------------------------|----------------------------------------|----------------------------------------------------------------------------------------------------------------------------------------------------------------------------------------------|------------------------------------------------------------------------------------------------------|-----------------------------------------------------------------------------------------------------------------------------|------|-------|
| DOX<br>+<br>Sclareol<br>(SC) | <b>MDA-MB-231</b> and<br><b>4T1</b> cells<br><br><b>4T1</b> tumour-bearing<br>mice<br><br>Intravenous           | (Natural lipids)<br><br>Solid lipid:<br>ATO<br><br>Liquid lipid:<br>OA<br>Peanut oil<br><br>Surfactant:<br>Tween 80                                                     | Sonication or<br>ultra-sonication | DLS<br>Microscopy (PLM)<br>DSC<br>SAXS | Size<br>$104 \pm 12$ nm<br><br>PDI<br>$0.23 \pm 0.02$<br><br>ZP<br>$-31 \pm 2$<br><br>%EE<br>$97 \pm 2\%$<br><br>Stability:<br>Not informed                                                  | Pharm.<br>Development<br><br><i>In vitro</i> tests<br><br><i>In vivo</i> :<br>Antitumour<br>activity | ✓ Improved<br>cytotoxicity<br>DOX-SC<br>synergism<br>✓ Improved<br>antitumoral<br>efficiency                                | [83] | [98]  |
| DOX<br>+<br>$\beta$ -elemene | <b>A549</b> and<br><b>A549/ADR</b> cells<br><br>Tumour xenografts<br><b>A549/ADR</b> in mice<br><br>Intravenous | (Synthetic lipids)<br><br>Solid lipid:<br>ATO<br><br>Liquid lipid:<br>Miglyol 812<br><br>Surfactant:<br>Lecithin<br>Tween 80<br><br>Functionalization:<br>mPEG-Hyd-DSPE | Sonication or<br>ultra-sonication | DLS<br>Microscopy (TEM)                | Size<br>190 nm<br><br>PDI<br>0.2<br><br>ZP<br>$-30.9$ and $-41.3$<br>mV<br><br>%EE <sub>DOX</sub><br>$89.3 \pm 3.9\%$<br><br>%EE <sub>ELE</sub><br>$87.7 \pm 4.2\%$<br><br>Stability:<br>72h | Pharm.<br>Development<br><br><i>In vitro</i> tests<br><br><i>In vivo</i> :<br>Antitumour<br>activity | ✓ Improved<br>cytotoxicity<br>DOX- $\beta$ -<br>elemene<br>synergistic<br>effect<br>✓ Improved<br>antitumoral<br>efficiency | [84] | [99]  |
| DOX<br>+                     | <b>MCF-7/ADR</b> cells                                                                                          | (Synthetic lipids)<br><br>Solid lipid:                                                                                                                                  | Sonication or<br>ultra-sonication | DLS<br>Microscopy (CLSM /<br>TEM)      | Size<br>$100.2 \pm 6.8$ nm                                                                                                                                                                   | Pharm.<br>Development                                                                                | ✓ Improved<br>DOX retention<br>in tumour                                                                                    | [85] | [100] |

|                           |                                                                              |                                                                                                                                                              |                                             |                      |                                                                                                                                                                                                    |                                                                                                                  |                                                                                   |      |       |
|---------------------------|------------------------------------------------------------------------------|--------------------------------------------------------------------------------------------------------------------------------------------------------------|---------------------------------------------|----------------------|----------------------------------------------------------------------------------------------------------------------------------------------------------------------------------------------------|------------------------------------------------------------------------------------------------------------------|-----------------------------------------------------------------------------------|------|-------|
| $\beta$ -Lapachone (LAPA) | MCF-7/ADR tumour-bearing mouse<br><br>Intravenous                            | GMS ATO<br><br>Liquid lipid: OA SPC<br><br>Surfactant P-188 PEG-SA                                                                                           |                                             |                      | PDI 0.123<br><br>ZP $-23.5 \pm 3.6$ mV<br><br>%EE 92.3%<br><br>Stability: Not informed                                                                                                             | <i>In vitro</i> tests<br><br><i>In vivo:</i> anticancer efficiency and distribution                              | ✓ Enhanced tumour inhibition                                                      |      |       |
| PTX + CIS                 | Head and neck cancer (FaDu) cell line<br><br>FaDu in mice<br><br>Intravenous | (Natural lipids)<br><br>Solid lipid: ATO<br><br>Liquid lipid: Olive oil Cremophor ELP<br><br>Surfactant: CTAB Tween 80<br><br>Functionalization: FA-PEG-DSPE | Solvent injection (or solvent displacement) | PCS Microscopy (TEM) | Size $127.1 \pm 5.1$ nm<br><br>PDI $0.23 \pm 0.07$<br><br>ZP $26.7 \pm 2.2$ mV<br><br>%EE <sub>CIS</sub> $82.1 \pm 3.4\%$<br><br>%EE <sub>PTX</sub> $79.2 \pm 3.1\%$<br><br>Stability Not informed | Pharm. Development<br><br><i>In vitro</i> tests<br><br><i>In vivo:</i> Tissue distribution and Anticancer effect | ✓ Improved cytotoxicity<br>✓ Improved tumour regressions                          | [86] | [101] |
| PTX +                     | A549 cells<br><br>Xenografts A549 cells in mice<br><br>Intravenous           | (Synthetic lipids)<br><br>Solid lipid: ATO<br><br>Liquid lipid                                                                                               | Emulsification-solvent diffusion            | DLS Microscopy (TEM) | Size $131.6 \pm 3.5$ nm<br><br>PDI $0.131 \pm 0.026$                                                                                                                                               | Pharm. Development<br><br><i>In vitro</i> tests<br><br><i>In vivo:</i>                                           | ✓ Improved cell uptake and the combination treatment<br>✓ PTX-DMN synergistically | [87] | [102] |

|                           |                                                                                                           |                                                                                                                                                                                          |                                  |                         |                                                                                                                                                                                                                       |                                                                                                 |                                                                             |      |       |
|---------------------------|-----------------------------------------------------------------------------------------------------------|------------------------------------------------------------------------------------------------------------------------------------------------------------------------------------------|----------------------------------|-------------------------|-----------------------------------------------------------------------------------------------------------------------------------------------------------------------------------------------------------------------|-------------------------------------------------------------------------------------------------|-----------------------------------------------------------------------------|------|-------|
| 5-Demethylnobiletin (DMN) |                                                                                                           | OA<br>SPC<br><br>Surfactant:<br>Lecithin<br>DSPE-PEG-Mal<br>DDAB                                                                                                                         |                                  |                         | ZP<br>$19.5 \pm 2.7$ mV<br><br>%EE <sub>PTX</sub><br>$90.5 \pm 4.2\%$<br><br>%EE <sub>DMN</sub><br>$91.1 \pm 3.7\%$<br><br>Stability:<br>90 days                                                                      | Anti-tumour effects and tissue distribution in mice                                             | ✓ decreased cancer cells viability<br>Improved tumour inhibition efficiency |      |       |
| CIS<br><br>+<br><br>5-FU  | Human gastric cancer (BGC823) cell line<br><br>Mice bearing BGC823 human GC xenografts<br><br>Intravenous | (Natural lipids)<br><br>Solid lipid:<br>GMS<br><br>Liquid lipid:<br>soybean oil<br><br>Surfactant:<br>Tween 80<br>Lecithin<br>DDBA<br><br>Functionalization:<br>HA and 5-FU linked to SA | Microemulsion technique          | DLS<br>Microscopy (TEM) | Size<br>$181.6 \pm 3.2$ nm<br><br>PDI<br>$0.21 \pm 0.04$<br><br>ZP<br>$26.3 \pm 2.4$ mV<br><br>%EE <sub>5-FU</sub><br>$89.8 \pm 2.9\%$<br><br>%EE <sub>CIS</sub><br>$89.1 \pm 2.1\%$<br><br>Stability<br>Not informed | Pharm. Development<br><br><i>In vitro</i> tests<br><br><i>In vivo</i> :<br>Efficacy             | ✓ Strongest antitumour activity                                             | [88] | [104] |
| TMZ<br><br>+<br><br>VCR   | U87 MG cells<br><br>U87 MG cells in mice<br><br>Intravenous                                               | (Synthetic lipids)<br><br>Solid lipid:<br>ATO<br><br>Liquid lipid:                                                                                                                       | Emulsification-solvent diffusion | DLS                     | Size<br>$117.4 \pm 2.8$ nm<br><br>PDI<br>$0.09 \pm 0.02$<br><br>ZP<br>$29.8 \pm 3.2$ mV                                                                                                                               | Pharm. Development<br><br><i>In vitro</i> tests<br><br><i>In vivo</i> :<br>Anti-tumour efficacy | ✓ Improved cytotoxicity<br>✓ Improved tumour inhibition                     | [89] | [105] |

|                         |                                                                                                               |                                                                                                                                                                                                            |                                    |                                |                                                                                                                                                                                          |                                                                                                                     |                                                                                                                                                          |      |   |
|-------------------------|---------------------------------------------------------------------------------------------------------------|------------------------------------------------------------------------------------------------------------------------------------------------------------------------------------------------------------|------------------------------------|--------------------------------|------------------------------------------------------------------------------------------------------------------------------------------------------------------------------------------|---------------------------------------------------------------------------------------------------------------------|----------------------------------------------------------------------------------------------------------------------------------------------------------|------|---|
|                         |                                                                                                               | Cremophor ELP<br>SPC<br><br>Surfactant:<br>DDAB<br>Lecithin                                                                                                                                                |                                    |                                | %EE <sub>TMZ</sub><br>88.9 ± 3.6%<br><br>%%EE <sub>VCR</sub><br>85.4 ± 2.8%<br><br>Stability<br>Not informed                                                                             |                                                                                                                     |                                                                                                                                                          |      |   |
| TMZ<br><br>+<br><br>VCR | U87 MG, human malignant glioma (T98G) cell line, and A549 cells<br><br>U87 MG in mice<br><br>Intravenous      | (Synthetic lipids)<br><br>Solid lipid:<br>Compritol 888 ATO<br><br>Liquid lipid:<br>Cremophor ELP<br><br>Surfactant:<br>DDAB<br>Lecithin<br><br>Functionalization:<br>Lactoferrin-PEG-DSPE<br>RGD-PEG-DSPE | Emulsification-solvent diffusion   | DLS                            | Size<br>139.3±4.9 nm<br><br>PDI<br>0.187 ± 0.021<br><br>ZP<br>32.4±2.7mV<br><br>%EE <sub>TMZ</sub><br>81.9 ± 3.4%<br><br>%%EE <sub>VCR</sub><br>82.2 ± 3.2%<br><br>Stability<br>3 months | Pharm. Development<br><br><i>In vitro</i> tests<br><br><i>In vivo</i> :<br>Tissue distribution, antitumour activity | ✓ Improved cytotoxicity with TMZ-VCR synergism<br>✓ increased drug accumulation in the tumour<br>✓ improved tumour inhibition with low systemic toxicity | [90] | - |
| GEM<br><br>+<br><br>PTX | Human pulmonary adenocarcinoma (A549, LTEPa2) cell lines<br><br>Tumour xenograft model of A549 cells in mouse | (Synthetic lipids)<br><br>Solid lipid:<br>GMS<br><br>Liquid lipid:<br>Soy lecithin<br><br>Surfactant:<br>Sodium deoxycholate                                                                               | Emulsification-solvent evaporation | DLS<br>Microscopy (CLSM / TEM) | Size<br>119.6 ± 0.3 nm<br><br>PDI<br>0.251 ± 0.03<br><br>ZP<br>-20.7 ± .9 mV                                                                                                             | Pharm. Development<br><br><i>In vitro</i> tests<br><br><i>In vivo</i> :<br>Antitumour effect                        | ✓ Suppression of tumour growth                                                                                                                           | [91] | - |

|                                                                                                                               |                                                                                                                      |                                                                                                                                                             |                                           |                                     |                                                                                                                                           |                                                                            |                                                                                                                       |      |   |
|-------------------------------------------------------------------------------------------------------------------------------|----------------------------------------------------------------------------------------------------------------------|-------------------------------------------------------------------------------------------------------------------------------------------------------------|-------------------------------------------|-------------------------------------|-------------------------------------------------------------------------------------------------------------------------------------------|----------------------------------------------------------------------------|-----------------------------------------------------------------------------------------------------------------------|------|---|
|                                                                                                                               | Intravenous                                                                                                          | Poloxamer 188<br>Tween 80<br><br>Functionalization:<br>NAG (N-acetyl-d-glucosamine), a<br>Glucose receptor ligand.                                          |                                           |                                     | %EE <sub>GEM</sub><br>83.7 ± 4.15<br><br>%EE <sub>PTX</sub><br>83.5 ± 2.72<br>Stability:<br>Not informed                                  |                                                                            |                                                                                                                       |      |   |
| GEM<br>+<br><br>PTX<br><br>(Covalently bound<br>through an ester linker<br>form drug conjugates)<br>associated to NAG-<br>NLC | Cell lines: <b>A549</b> ,<br><b>NCLH1299</b> and<br><b>LTEPa2</b>                                                    | (Synthetic lipids)<br><br>Solid lipid:<br>GMS<br><br>Liquid lipid:<br>Soy lecithin<br><br>Surfactant:<br>P-188<br>Tween 80<br><br>Functionalization:<br>NAG | Emulsification-<br>solvent<br>evaporation | DLS<br>Microscopy (CLSM /<br>TEM)   | Size<br>120.3 ± 1.3 nm<br><br>PDI<br>0.233 ± 0.04<br><br>ZP<br>-27.8 ± 3.4 mV<br><br>%EE<br>Not informed<br><br>Stability<br>Not informed | Pharm.<br>Development<br><br><i>In vitro</i> tests                         | ✓ Superior<br>cytotoxicity<br>✓ High uptake<br>by A549 cells<br>(via glucose<br>receptor-<br>mediated<br>endocytosis) | [92] | - |
| GEM<br>+<br><br>BCL                                                                                                           | Human pancreatic<br>adenocarcinoma<br>( <b>AsPC1</b> ) cell line<br>and <b>HeLa</b> cells<br><br>AsPC1 cells in mice | (Synthetic / Natural lipids)<br><br>Solid Lipid:<br>Precirol ATO-5<br><br>Liquid lipid:                                                                     | Solvent<br>evaporation                    | PCS<br>H NMR and IR<br>spectroscopy | Size<br>131.9 ± 3.9 nm<br><br>PDI<br>0.12 ± 0.03                                                                                          | Pharm.<br>Development<br><br><i>In vitro</i> tests<br><br><i>In vivo</i> : | ✓ Significant<br>tumour growth<br>inhibition                                                                          | [93] | - |

|                                       |                                                                                        |                                                                                                                                                                                                       |                                |                       |                                                                                                                                                           |                                                                                                      |                                                                            |      |   |
|---------------------------------------|----------------------------------------------------------------------------------------|-------------------------------------------------------------------------------------------------------------------------------------------------------------------------------------------------------|--------------------------------|-----------------------|-----------------------------------------------------------------------------------------------------------------------------------------------------------|------------------------------------------------------------------------------------------------------|----------------------------------------------------------------------------|------|---|
|                                       | Intravenous                                                                            | Olive oil<br><br>Surfactant:<br>Tween 80<br>DDAB<br>SPC<br><br>Functionalization:<br>HA                                                                                                               |                                |                       | ZP<br>$-25.9 \pm 1.9$ mV<br><br>%EE <sub>GEM</sub><br>$85.1 \pm 2.3\%$<br><br>%EE <sub>BCL</sub><br>$82.9 \pm 2.4\%$<br><br>Stability<br>1 month          | Antitumour effect<br>Tissue distribution                                                             |                                                                            |      |   |
| PTX<br><br>+<br><br>Salinomycin (SAL) | NCI-H1299 and S180 cells<br><br>S180 cells in mice<br><br>Intravenous                  | (Synthetic lipids)<br><br>Solid lipid:<br>ATO<br><br>Liquid lipid:<br>MCT<br><br>Surfactant<br>Polyoxyethylene (40) stearate<br>Solutol HS15<br>Kolliphor EL<br><br>Functionalization:<br>DSPE-PEG-TR | Microemulsion technique        | DLS Microscopy (CLSM) | Size<br>$128.73 \pm 2.09$ nm<br><br>PDI<br>Not informed<br><br>ZP<br>$-28.3 \pm 0.4$ mv<br><br>%EE<br>$95.62 \pm 1.46\%$<br><br>Stability<br>Not informed | Pharm. Development<br><br><i>In vitro</i> tests<br><br><i>In vivo</i> :<br>Antitumour effect         | ✓ Greater tumour suppression                                               | [94] | - |
| PTX<br><br>+<br><br>SiRNA             | A549 cells<br><br>Mouse orthotopic model of human lung cancer (A549)<br><br>Inhalation | (Synthetic lipids)<br><br>Solid lipid:<br>Precirol ATO 5<br><br>Liquid lipid:<br>Squalene<br>SPC                                                                                                      | Sonication or ultra-sonication | DLS Microscopy (AFM)  | Size<br>$110 \pm 20$ nm<br><br>PDI<br>0.4<br><br>ZP<br>60.3 mV                                                                                            | Pharm. Development<br><br><i>In vitro</i> tests<br><br><i>In vivo</i> :<br>Efficacy, biodistribution | ✓ Improved accumulation in lung cancer<br>✓ Enhanced antitumour efficiency | [95] | - |



|                                        |                                                                                                                                              |                                                                                                                                                                    |                                      |                         |                                                                                                                                 |                                                                                                                                         |                                                                                                                       |      |   |
|----------------------------------------|----------------------------------------------------------------------------------------------------------------------------------------------|--------------------------------------------------------------------------------------------------------------------------------------------------------------------|--------------------------------------|-------------------------|---------------------------------------------------------------------------------------------------------------------------------|-----------------------------------------------------------------------------------------------------------------------------------------|-----------------------------------------------------------------------------------------------------------------------|------|---|
|                                        |                                                                                                                                              | Surfactant<br>Tween-80<br>DOTAP<br>Lecithin<br><br>Functionalization:<br>DSPE-PEG-LHRH                                                                             |                                      |                         | %EE<br>Not informed<br><br>Stability<br>1 month                                                                                 |                                                                                                                                         |                                                                                                                       |      |   |
| PTX<br><br>+<br><br>pEGFP              | NCI-H460 cells<br><br>NCI-H460 cells in mice<br><br>Intravenous                                                                              | (Synthetic lipids)<br><br>Solid lipid:<br>GMS<br><br>Liquid lipid<br>OA<br><br>Surfactant:<br>DOTMA<br>Tween-80<br>Lecithin<br><br>Functionalization:<br>Tf-PEG-PE | Microemulsion<br>technique           | LLS<br>Microscopy (TEM) | Size<br>133 nm<br><br>PDI<br>Not informed<br><br>ZP<br>19 mV<br><br>%EE<br>85.4 ± 2.9%<br><br>Stability<br>Not informed         | Pharm.<br>Development<br><br><i>In vitro</i> tests<br><br><i>In vivo</i> :<br>Antitumour<br>efficacy; gene<br>transfection<br>analysis. | ✓ Increased <i>in vivo</i> gene<br>transfection<br>efficiency<br>✓ Improved<br>antitumour<br>efficacy                 | [96] | - |
| DOX<br><br>+<br><br>Sorafenib<br>(SFN) | Mice drug-resistant<br>oesophagus<br>carcinoma<br>(AKR/Dox) cell line<br><br>AKR/Dox tumour-<br>bearing model in<br>mice.<br><br>Intravenous | (Synthetic lipids)<br><br>Solid lipid:<br>GMS<br><br>Liquid lipid<br>OA<br><br>Surfactant:<br>Lecithin<br>PC<br><br>Functionalization:<br>SA-PEG-FA                | Emulsification-<br>solvent diffusion | DLS                     | Size<br>100 nm<br><br>PDI<br>Not informed<br><br>ZP<br>Not informed<br><br>%EE<br>Not informed<br><br>Stability<br>Not informed | Pharm.<br>Development<br><br><i>In vitro</i> tests<br><br><i>In vivo</i> :<br>anticancer<br>efficacy,<br>immune<br><i>activation</i>    | ✓ DOX-SFN<br>synergistic<br>effect<br>(improved<br>cytotoxicity)<br>✓ Strong<br>immune<br>response after<br>treatment | [97] | - |

|                             |                                                  |                                                                                                                                                        |                                                |                                       |                                                                                                                                                                                                            |                                                    |                                                                                                                                           |       |   |
|-----------------------------|--------------------------------------------------|--------------------------------------------------------------------------------------------------------------------------------------------------------|------------------------------------------------|---------------------------------------|------------------------------------------------------------------------------------------------------------------------------------------------------------------------------------------------------------|----------------------------------------------------|-------------------------------------------------------------------------------------------------------------------------------------------|-------|---|
| MTX<br>+<br>DTX<br>+<br>DOX | MCF-7 and A549 cells                             | (Synthetic lipids)<br><br>Solid lipid:<br>GMS<br>SA<br><br>Liquid lipid:<br>Miglyol 812<br><br>Surfactant:<br>Poloxamer 407                            | Solvent injection<br>(or solvent displacement) | DLS<br>Microscopy (SEM / TEM)<br>FTIR | Size<br>233.3 nm<br><br>PDI<br>0.14<br><br>ZP<br>Not informed<br><br>%EE <sub>MTX</sub><br>33.73%<br><br>%EE <sub>DOX</sub><br>90.48%<br><br>%EE <sub>DTX</sub><br>98.95%<br><br>Stability<br>Not informed | Pharm.<br>Development<br><br><i>In vitro</i> tests | ✓ Increased cell uptake, apoptosis, autophagy, ROS levels<br><br>✓ Clonogenicity tests revealed decreased colony formation in MCF-7 cells | [98]  | - |
| DTX<br>+<br>Trastuzumab     | Breast cancer (MDA-MB-468 and BT-474) cell lines | (Natural lipids)<br><br>Solid lipid:<br>SA<br>Stearyl amine<br>Spermine<br>Chol<br><br>Liquid lipid:<br>Castor oil<br><br>Surfactant<br>Poloxamer F127 | Sonication or ultra-sonication                 | DLS<br>Microscopy (SEM/ TEM)          | Size<br>199 ± 10 nm<br><br>PDI<br>0.65 ± 0.05<br><br>ZP<br>~18 mV<br><br>%EE <sub>DTX</sub><br>75.5 ± 2.0%<br><br>Stability<br>Not informed                                                                | Pharm.<br>Development<br><br><i>In vitro</i> tests | ✓ Enhanced cellular uptake<br><br>✓ Higher cytotoxic effect                                                                               | [99]  | - |
| DTX                         | MDA-MBA-231 cells                                | (Synthetic lipids)                                                                                                                                     | Sonication or ultra-sonication                 | DLS<br>Microscopy (SEM)               | Size<br>55 a 110 nm                                                                                                                                                                                        | Pharm.<br>development                              | ✓ Improved cytotoxicity                                                                                                                   | [100] | - |

|           |  |                                 |  |  |                           |                       |                                  |  |  |
|-----------|--|---------------------------------|--|--|---------------------------|-----------------------|----------------------------------|--|--|
| +         |  | Solid lipid:<br>ATO             |  |  | PDI<br>0.19               | <i>In vitro</i> tests | ✓ Increase in<br>apoptotic cells |  |  |
| Myricetin |  | Liquid lipid:<br>Miglyol 812    |  |  | ZP<br>-12 mV              |                       |                                  |  |  |
|           |  | Surfactant:<br>Poloxamer 407    |  |  | % EE<br>Not informed      |                       |                                  |  |  |
|           |  | Functionalization:<br>Myricetin |  |  | Stability<br>Not informed |                       |                                  |  |  |

## New approaches in chemotherapy

### Curcumin as non-conventional AA encapsulated in NLC Curcumin

| Drug           | Tumour tested and route                                         | Composition                                                                                                                                 | Preparation method      | Characterization                        | Physical-chemical properties                                                               | Tests conducted                          | Main results                                                                                | Ref.  | Ref. in the review |
|----------------|-----------------------------------------------------------------|---------------------------------------------------------------------------------------------------------------------------------------------|-------------------------|-----------------------------------------|--------------------------------------------------------------------------------------------|------------------------------------------|---------------------------------------------------------------------------------------------|-------|--------------------|
| Curcumin (CUR) | Human epithelial ovarian cancer (A2780S and A2780CP) cell lines | (Synthetic lipids)<br>Solid lipid:<br>ATO<br><br>Liquid lipid:<br>Captex 355 EP/NF<br>Miglyol 812<br><br>Surfactant:<br>SPC<br>Taurocholate | Microemulsion technique | DLS<br>Microscopy (fluorescent)<br>FTIR | Size<br>~100 nm<br><br>PDI<br>> 0.2<br><br>ZP<br>-30 mV<br><br>%EE<br>40%<br><br>Stability | Development<br><br><i>In vitro</i> tests | ✓ Improved cytotoxicity<br>✓ Improved inhibition colony formation<br>✓ No haemolytic effect | [101] | -                  |

|     |                                               |                                                                                                                                                                 |                         |                              |                                                                                                                                      |                                                                                         |                                                                                                    |       |   |
|-----|-----------------------------------------------|-----------------------------------------------------------------------------------------------------------------------------------------------------------------|-------------------------|------------------------------|--------------------------------------------------------------------------------------------------------------------------------------|-----------------------------------------------------------------------------------------|----------------------------------------------------------------------------------------------------|-------|---|
|     |                                               |                                                                                                                                                                 |                         |                              | Not informed                                                                                                                         |                                                                                         |                                                                                                    |       |   |
| CUR | Human neuroblastoma cell line ( <b>LAN5</b> ) | (Synthetic lipids)<br><br>Solid lipid:<br>ATO<br>Precirol ATO<br><br>Liquid lipid:<br>Imwitor 800<br><br>Surfactant:<br>Lecithin<br>Taurocholate                | Microemulsion technique | PCS Microscopy (fluorescent) | Size<br>110 – 135 nm<br><br>PDI<br>0.2 – 0.3<br><br>ZP<br>–24 to – 18 mV<br><br>%EE<br>Not informed<br><br>Stability<br>Not informed | Development<br><br><i>In vitro</i> tests                                                | ✓ Improved cytotoxicity                                                                            | [102] | - |
| CUR | <b>A549</b> cells                             | (Synthetic lipids)<br><br>Solid lipid:<br>Monostearin<br><br>Liquid lipid:<br>Octyl decyl acid triglycerate<br><br>Surfactant:<br>Lecithin<br>P-188<br>Tween-80 | Microemulsion technique | DLS Microscopy (fluorescent) | Size<br>99.99 nm<br><br>PDI<br>0.158<br><br>ZP<br>–19.9 mV<br><br>%EE<br>97.86 %<br><br>Stability<br>Not informed                    | Development<br><br><i>In vitro</i> tests<br><br><i>In vivo</i> test:<br>Pharmacokinetic | ✓ Improved cytotoxicity<br>✓ Increased apoptosis<br>✓ Improved bioavailability                     | [103] | - |
| CUR | <b>HepG2</b> cells                            | (Synthetic lipids)<br><br>Solid lipid:<br>Monostearin<br><br>Liquid lipid:                                                                                      | Microemulsion technique | DLS                          | Size<br>$99.99 \pm 1.87$ nm<br><br>PDI<br>$0.158 \pm 0.005$<br><br>ZP                                                                | Development<br><br><i>In vitro</i> tests                                                | ✓ Improved cytotoxicity<br>✓ increased caspase-8 and caspase-3 activities<br>✓ increased apoptosis | [104] | - |

|     |                                                                                             |                                                                                                                                                                                                    |                                    |                            |                                                                                                                                           |                                                                                                                                         |                                                                                                                            |       |       |
|-----|---------------------------------------------------------------------------------------------|----------------------------------------------------------------------------------------------------------------------------------------------------------------------------------------------------|------------------------------------|----------------------------|-------------------------------------------------------------------------------------------------------------------------------------------|-----------------------------------------------------------------------------------------------------------------------------------------|----------------------------------------------------------------------------------------------------------------------------|-------|-------|
|     |                                                                                             | octyl decyl acid triglycerate<br><br>Surfactant:<br>Lecithin<br>P-188<br>Tween-80                                                                                                                  |                                    |                            | -19.9 ± 0.65 mV<br><br>%EE<br>97.86 ± 0.72 %<br><br>Stability<br>Not informed                                                             |                                                                                                                                         |                                                                                                                            |       |       |
| CUR | MCF-7 cells                                                                                 | (Natural lipids)<br><br>Solid lipid:<br>Cetyl palmitate<br><br>Liquid lipid:<br>Cod-liver oil<br><br>Surfactant:<br>Tween 80<br><br>Functionalization:<br>Fe <sub>3</sub> O <sub>4</sub> particles | Sonication or ultra-sonication     | DLS Microscopy (TEM)       | Size<br>166.7 ± 14.20 nm<br><br>PDI<br>0.24 ± 0.14<br><br>ZP<br>-27.6 ± 3.83 mV<br><br>%EE<br>99.95 ± 0.015%<br><br>Stability<br>5 months | Development<br><br><i>In vitro</i> tests                                                                                                | ✓ Improved cytotoxicity                                                                                                    | [105] | -     |
| CUR | Human brain cancer cell (A172)<br><br>Mice bearing A172 xenografts<br><br>Intraperitoneally | (Synthetic lipids)<br><br>Solid lipid:<br>Tripalmitin<br><br>Liquid lipid:<br>OA<br><br>Surfactant:<br>Tween 80                                                                                    | High-pressure homogenization (HPH) | PCS Microscopy (CLSM /TEM) | Size<br>214.0 nm<br><br>PDI<br>Not informed<br><br>ZP<br>Not informed<br><br>%EE<br>88.6%<br><br>Stability                                | Development<br><br><i>In vitro</i> tests<br><br><i>In vivo</i> test:<br>Tumour regression, plasma concentration and tissue distribution | ✓ Improved cytotoxicity<br>✓ Apoptosis ratio and ROS levels<br>✓ Higher bioavailability<br>✓ Significant tumour inhibition | [106] | [108] |

|                                                                |                                                                            |                                                                                                                                                            |                                          |                                                |                                                                                                                                                |                                                                 |                                                                                                                            |                |               |
|----------------------------------------------------------------|----------------------------------------------------------------------------|------------------------------------------------------------------------------------------------------------------------------------------------------------|------------------------------------------|------------------------------------------------|------------------------------------------------------------------------------------------------------------------------------------------------|-----------------------------------------------------------------|----------------------------------------------------------------------------------------------------------------------------|----------------|---------------|
|                                                                |                                                                            |                                                                                                                                                            |                                          |                                                | Not informed                                                                                                                                   |                                                                 |                                                                                                                            |                |               |
| CUR<br><br>+<br><br>PDT                                        | MCF-7 cells                                                                | (Natural lipids)<br><br>Solid lipid:<br>GMO<br><br>Liquid lipid:<br>Olive oil<br><br>Surfactant:<br>Tween 80<br>Lecithin                                   | High-pressure<br>homogenization<br>(HPH) | DLS<br>Microscopy (TEM)                        | Size<br>$113.94 \pm 11.3$<br>nm<br><br>PDI<br>$0.29 \pm 0.05$<br><br>ZP<br>$-47.50 \pm 2.69$<br><br>%EE<br>82.49%<br><br>Stability<br>2 months | Pharm. Development<br><br><i>In vitro</i> tests                 | ✓ Superior cytotoxicity<br>in breast cancer cells                                                                          | [107]          | -             |
| CUR<br><br>+<br><br>Imatinib<br>(monoclonal<br>antibody – IMT) | Non-Hodgkin<br>lymphoma<br>( <b>Jurkat</b> and<br><b>Ramos</b> cell lines) | (Synthetic lipids)<br><br>Solid lipid:<br>GMS<br><br>Liquid lipid:<br>OA<br><br>Surfactant:<br>Tween 80<br>Lecithin<br><br>Functionalization:<br>Rituximab | Emulsification-<br>solvent diffusion     | DLS<br>Microscopy (AFM)                        | Size<br>$272.0 \pm 0.3$ nm<br><br>PDI<br>0.4<br><br>ZP<br>$8.2 \pm 0.1$ mV<br><br>%EE<br>100%<br><br>Stability<br>Not informed                 | Pharm. Development<br><br><i>In vitro</i> tests                 | ✓ CUR-NLC showed<br>significant cytotoxic<br>effect<br>✓ Co-administration<br>with imatinib reduced<br>the imatinib doses. | [108]          | [109]         |
| CUR<br><br>+<br><br>DTX                                        | NCL-H460 cells<br><br>Urethane induced<br>lung carcinoma in<br>mice        | (Synthetic lipids)<br><br>Solid lipid:<br>Glyceryl<br>Palmitostearate<br>Trimyristin                                                                       | High-pressure<br>homogenization<br>(HPH) | DLS<br>Microscopy (TEM)<br>DSC<br>FTIR<br>PXRD | Size<br>$150.2 \pm 5.2$ nm<br><br>PDI<br>$0.263 \pm 0.15$                                                                                      | Pharm. Development<br><br><i>In vitro</i> tests<br><br>In vivo: | ✓ Improved cytotoxicity<br>✓ Significantly <i>better in vivo</i> effects than<br>Taxotere®<br>✓ Lower toxicity             | [109]<br>[110] | [110]<br>[91] |

|                         |                                                        |                                                                                                       |                            |                                   |                                                                                                                                                                                                                                     |                                                                                                                                          |                                                                                                                                                                                   |       |       |
|-------------------------|--------------------------------------------------------|-------------------------------------------------------------------------------------------------------|----------------------------|-----------------------------------|-------------------------------------------------------------------------------------------------------------------------------------------------------------------------------------------------------------------------------------|------------------------------------------------------------------------------------------------------------------------------------------|-----------------------------------------------------------------------------------------------------------------------------------------------------------------------------------|-------|-------|
|                         | Intravenous                                            | Liquid lipid:<br>MCT<br><br>Surfactant:<br>Solutol HS15<br>Lecithin<br><br>Functionalization:<br>FA   |                            |                                   | ZP<br>$26.3 \pm 5.2$ mV<br><br>%EE <sub>DTX</sub><br>$94.4 \pm 2.3$ %<br><br>%EE <sub>CUR</sub><br>$95.10 \pm 2.8$ %<br><br>Stability<br>Not informed                                                                               | Pharmacokinetics<br>studies;<br>Pharmacodynamics<br>study; efficacy,<br>Toxicity                                                         |                                                                                                                                                                                   |       |       |
| CUR<br><br>+<br><br>TMZ | Glioma (C6) cells<br><br>C6 in mice<br><br>Intravenous | (Synthetic lipids)<br><br>Solid lipid:<br>GMS<br><br>Liquid lipid:<br>MCT<br><br>Surfactant:<br>P-188 | Microemulsion<br>technique | DLS<br>Microscopy<br>(TEM)<br>DSC | Size<br>$78.49 \pm 0.38$ nm<br><br>PDI<br>$0.22 \pm 0.01$<br><br>ZP<br>$- 8.54 \pm 0.51$<br>mV<br><br>%EE <sub>TMZ</sub><br>$70.90\% \pm 0.06\%$<br><br>%EE <sub>CUR</sub><br>$68.17\% \pm 0.20\%$<br><br>Stability<br>Not informed | Pharm. Development<br><br><i>In vitro</i> tests<br><br><i>In vivo</i> :<br>Antitumour effect,<br>biodistribution and<br>toxicity in mice | ✓ Significant synergistic<br>(CUR/TMZ)<br>anticancer effect <i>in vivo</i> .<br><br>✓ No toxic effects of on<br>major organs and<br>normal cells at the<br>same therapeutic dose. | [111] | [111] |

## Photodynamic and photothermal therapy

| Photosensitizer | Tumour tested<br>and route | Composition | Preparation<br>method | Characterization | Physical-<br>chemical<br>properties | Tests conducted | Main results | Ref. | Ref. in the<br>review |
|-----------------|----------------------------|-------------|-----------------------|------------------|-------------------------------------|-----------------|--------------|------|-----------------------|
|-----------------|----------------------------|-------------|-----------------------|------------------|-------------------------------------|-----------------|--------------|------|-----------------------|

|                                        |                                                                                                                                                                  |                                                                                                            |                                    |                                                |                                                                                                                                                         |                                                                                                                                       |                                                                                                  |       |       |
|----------------------------------------|------------------------------------------------------------------------------------------------------------------------------------------------------------------|------------------------------------------------------------------------------------------------------------|------------------------------------|------------------------------------------------|---------------------------------------------------------------------------------------------------------------------------------------------------------|---------------------------------------------------------------------------------------------------------------------------------------|--------------------------------------------------------------------------------------------------|-------|-------|
| Chloroaluminum phthalocyanine (CIAIPc) | <b>A549</b> and <b>B16-F10</b> cells                                                                                                                             | (Synthetic lipids)<br><br>Solid lipid: SA<br><br>Liquid lipid: OA<br><br>Surfactant: Sodium lauryl sulfate | Emulsification-solvent diffusion   | DLS<br>Microscopy (TEM)<br>DSC<br>FTIR<br>SAXS | Size<br>$205.9 \pm 22.7$ nm<br><br>PDI<br>$0.46 \pm 0.04$<br><br>ZP<br>$-69.1 \pm 18.5$ mV<br><br>%EE<br>$95.8 \pm 0.03$ %<br><br>Stability<br>3 months | Pharm. Development<br><br><i>In vitro</i> tests<br><br>In vivo:<br>Skin permeation in rat                                             | ✓ Improved cytotoxicity<br>✓ Increased the retained of drug into the skin.<br>✓ biocompatible    | [112] | [123] |
| IR780                                  | Human epithelial colorectal adenocarcinoma cell line ( <b>Caco-2</b> ) and mouse colon cancer cell line ( <b>CT-26</b> )<br><br><b>CT-26</b> in mice<br><br>Oral | (Synthetic lipids)<br><br>Solid lipid: Trilaurin<br><br>Liquid lipid: CT<br><br>Surfactant: Soy lecithin   | Emulsification-solvent evaporation | DLS<br>Microscopy (TEM / CLSM)                 | Size<br>170 nm<br><br>PDI<br>0.057<br><br>ZP<br>Not informed<br><br>%EE<br>Not informed<br><br>Stability<br>2h                                          | Pharm. Development<br><br><i>In vitro</i> tests<br><br>In vivo:<br><i>Pharmacokinetics, Biodistribution, and Therapeutic Activity</i> | ✓ Enhanced oral absorption<br>✓ Increased oral bioavailability<br>✓ Improved antitumour efficacy | [113] | [121] |
| IR780                                  | <b>4T1</b> cells<br><br><b>4T1</b> in mice<br><br>Intravenous                                                                                                    | (Synthetic lipids)<br><br>Solid lipid: Trilaurin<br><br>Liquid lipid:                                      | Emulsification-solvent evaporation | DLS<br>Microscopy (TEM / CLSM)                 | Size<br>~135 nm<br><br>PDI<br>Not informed                                                                                                              | Pharm. Development<br><br><i>In vitro</i> tests<br><br>In vivo:                                                                       | ✓ Photothermal properties of IR780 were improved<br>✓ Accumulated at high levels in tumours      | [114] | [122] |



|                                  |                                                                                                                                            |                                                                                                                                                                                          |                                        |                                         |                                                                                                                                                |                                                                                                                                              |                                                                                                                                                                       |       |       |
|----------------------------------|--------------------------------------------------------------------------------------------------------------------------------------------|------------------------------------------------------------------------------------------------------------------------------------------------------------------------------------------|----------------------------------------|-----------------------------------------|------------------------------------------------------------------------------------------------------------------------------------------------|----------------------------------------------------------------------------------------------------------------------------------------------|-----------------------------------------------------------------------------------------------------------------------------------------------------------------------|-------|-------|
|                                  |                                                                                                                                            | MCT<br><br>Surfactant:<br>PC<br><br>Functionalization:<br>AMD3100                                                                                                                        |                                        |                                         | ZP<br>−12 mV<br><br>%EE<br>94.6 ± 1.4%<br><br>Stability<br>Not informed                                                                        | Pharmacokinetics,<br>Biodistribution, and<br>Therapeutic Activity                                                                            | ✓ Anti-metastatic<br>efficacy                                                                                                                                         |       |       |
| Verteporfin<br>(VTP)             | Human ovarian<br>cancer cell lines:<br><b>SKOV3</b> ,<br><b>OVCAR3</b> and<br><b>IGROV1</b><br><br><b>SKOV3</b> in mice<br><br>Intravenous | (Natural lipids)<br><br>Solid lipid:<br>Suppocir NB<br><br>Liquid lipid:<br>Soybean oil<br><br>Surfactant:<br>Polyoxyethylene 40                                                         | Emulsification-<br>solvent evaporation | DLS<br>Microscopy (CLSM)                | Size<br>~47.9 ± 1.0<br><br>PDI<br>0.12 ± 0.02<br><br>ZP<br>−3.7 ± 0.9<br><br>%EE<br>< 95 %<br><br>Stability:<br>Not informed                   | Pharm. Development<br><br><i>In vitro</i> tests<br><br><i>In vivo</i> :<br>Pharmacokinetics,<br>Biodistribution, and<br>Therapeutic Activity | ✓ Enhanced deleterious<br>effects in ovarian<br>cancer cells cultured in<br>monolayer, in<br>spheroids, and <i>in vivo</i><br>(in tumour bearing<br>mice).            | [115] | [124] |
| Zinc<br>phthalocyanine<br>(ZnPc) | <b>MCF-7</b> cells                                                                                                                         | (Synthetic lipids)<br><br>Solid lipid:<br>Ethoxylated<br>hydrogenated<br>Castor oil 40<br><br>Liquid lipid:<br>capric/caprylic acid<br>triglycerides<br><br>Surfactant:<br>Pluronic F127 | Emulsification-<br>solvent evaporation | DLS<br>Microscopy (CLSM)<br>FTIR<br>NMR | Size<br>166.7 ± 1.33<br>nm<br><br>PDI<br>0.14 ± 0.018<br><br>ZP<br>−16.4 ± 0.45<br>mV<br><br>%EE<br>63.00 ± 1.19%<br><br>Stability<br>3 months | Pharm. Development<br><br><i>In vitro</i> tests                                                                                              | ✓ New nanocarrier for<br>photodynamic therapy,<br>rationally designed<br>✓ The photosensitizer<br>was by first time used<br>in drug delivery tests<br>and MTT assays. | [116] | [120] |

|                                   |                    |                                                                                                                       |                                                             |                                       |                                                                                                                                                        |                                                                                                           |                                                                                                        |       |       |
|-----------------------------------|--------------------|-----------------------------------------------------------------------------------------------------------------------|-------------------------------------------------------------|---------------------------------------|--------------------------------------------------------------------------------------------------------------------------------------------------------|-----------------------------------------------------------------------------------------------------------|--------------------------------------------------------------------------------------------------------|-------|-------|
|                                   |                    | Polyoxyethylene 40<br><br>Functionalization:<br>FA                                                                    |                                                             |                                       |                                                                                                                                                        |                                                                                                           |                                                                                                        |       |       |
| 5-amino levulinic acid<br>(5-ALA) | Vero E6 cell lines | (Synthetic lipids)<br><br>Solid lipid:<br>Compritol ATO 888<br><br>Liquid lipid:<br>OA<br><br>Surfactant:<br>Tween 20 | Microemulsion technique<br>Emulsification-solvent diffusion | DLS<br>Microscopy (CLSM / TEM)<br>DSC | Size<br>$194.16 \pm 5.73$ nm<br><br>PDI<br>$0.24 \pm 0.03$<br><br>ZP<br>Not informed<br><br>%EE<br>$72.84 \pm 3.81$ %<br><br>Stability<br>Not informed | Pharm. Development<br><br><i>In vitro</i> tests<br><br><i>In vivo</i> :<br>skin permeation studies in rat | ✓ Increased concentration in the target skin layers                                                    | [117] | [118] |
| DHX-1                             | 4T1 cells          | (Natural lipids)<br><br>Solid lipid:<br>ATO<br><br>Liquid lipid:<br>Babassu oil<br><br>Surfactant:<br>Kolliphor HS    | Emulsification-solvent evaporation                          | DLS<br>Microscopy (TEM)               | Size<br>$92.1 \pm 0.7$ nm<br><br>PDI<br>$0.215 \pm 0.030$<br><br>ZP<br>$-1.12 \pm 0.09$ mV<br><br>%EE<br>Not informed<br><br>Stability<br>Not informed | Pharm. Development<br><br><i>In vitro</i> tests                                                           | ✓ <i>In vitro</i> demonstration of photosensitizer activity<br>✓ DDS may serve as a theragnostic agent | [118] | [119] |
| Chlorin e6 (Ce6)<br>+<br>PTX      | MDA-MB-231 cells   | (Synthetic lipids)<br><br>Solid lipid:<br>Precirol ATO 5                                                              | Emulsification-solvent evaporation                          | DLS<br>Microscopy (CLSM / TEM)<br>DSC | Size<br>$120.79 \pm 1.68$ nm                                                                                                                           | Pharm. Development<br><br><i>In vitro</i> tests                                                           | ✓ Long circulation and tumour targeting<br>✓ PDT combined with chemotherapy                            | [119] | [125] |

|                                             |                                                                               |                                                                                                                                            |                                             |                         |                                                                                                                          |                                                                                                      |                                                                                                                                                                           |       |   |
|---------------------------------------------|-------------------------------------------------------------------------------|--------------------------------------------------------------------------------------------------------------------------------------------|---------------------------------------------|-------------------------|--------------------------------------------------------------------------------------------------------------------------|------------------------------------------------------------------------------------------------------|---------------------------------------------------------------------------------------------------------------------------------------------------------------------------|-------|---|
|                                             | <b>MDA-MB-231 in mice</b><br><br>Intravenous                                  | Liquid lipid:<br>Cremophor RH40<br><br>Surfactant:<br>Cremophor RH40<br><br>Functionalization:<br>DSPE-PEG-Ce6                             |                                             | XRD                     | PDI<br>$0.19 \pm 0.01$<br><br>ZP<br>$-38.8 \pm 1.5$ mV<br><br>%EE<br>$76.67 \pm 0.61\%$<br><br>Stability<br>Not informed | <i>In vivo</i> :<br>Biodistribution efficacy                                                         | produced synergistic effects                                                                                                                                              |       |   |
| Indocyanine green (ICG)<br><br>+<br><br>PTX | <b>HepG2</b> cells<br><br><b>HepG2</b> tumour-bearing mice<br><br>Intravenous | (Synthetic lipids)<br><br>Solid lipid:<br>GMS<br><br>Liquid lipid:<br>OA<br><br>Surfactant<br>P-188<br><br>Functionalization:<br>SA-PEG-FA | Solvent injection (or solvent displacement) | DLS<br>Microscopy (TEM) | Size<br>92.6 nm<br><br>PDI<br>0.115<br><br>ZP<br>Not informed<br><br>%EE<br>Not informed<br><br>Stability: not informed  | Pharm. Development<br><br><i>In vitro</i> tests<br><br><i>In vivo</i> :<br>Biodistribution and image | ✓ Increased drug intracellular uptake<br>✓ Increased cytotoxicity in cancer cells (ICG-PTX synergistic effect)<br>✓ Excellent tumour targetability in tumour-bearing mice | [120] | - |

\* In this report (ref. 76) two NLC formulations, one with DOX and the other containing PTX were tested and compared.

## Abbreviations:

5-ALA – 5 amino levulinic acid; 2-DG – stearyl-2-amino-2-deoxyglucose; 5-FU – 5-fluorouracil; AF4 – asymmetric flow field-flow fractionation; AFM – atomic force microscopy; ApoB – apolipoprotein B-100; ATO – Compritol 888; BCL – baicalein; CBZ – cabazitaxel; Ce-6 – chlorin e6; CHEMS – cholesteryl hemisuccinate; Chol – Cholesterol; CIS – cisplatin; ClAlPc – Chloroaluminum phthalocyanine; CLSM – confocal laser scanning microscopy; CT – capric triglyceride; CTAB – cetyltrimethylammonium bromide; CUR – curcumin; CXCR4 - antagonist of the chemokine receptor; CYT – cytarabine; DCB – decitabine; DDAB – Didecyltrimethylammonium bromide; DHA – docosahexaenoic acid; DLS – dynamic light scattering; DMN – 5-demethylnobiletin ; DN – docetaxel complexed with nicotinamide; DNPA – delse nano particle analyser; DOTMA – N-[1-(2,3-dioleoyloxy)propyl]-N,N,N-trimethyl-ammonium chloride; DOX –

doxorubicin; DSC – differential Scanning calorimetry; DSPE-PEG – Distearoyl-phosphatidylethanolamine; DSPE-PEG-Ce6 – distearoyl-phosphatidylethanolamine-chlorin e6; DSPE-PEG-Mal – distearoyl-phosphatidylethanolamine-Mal; DSPE-PEG-NH<sub>2</sub> – 1,2-Distearoyl-sn-glycero-3-phosphoethanolamine-N-[amino(polyethylene glycol)]; DSPE-PEG-TR – distearoyl-phosphatidylethanolamine-targeting peptide TISWPPR; DOTAP – 1,2-Dioleoyl-3-trimethylammoniumpropane; DTX – docetaxel; DZ – dacarbazine; EE – encapsulation efficiency; ELS – electrophoretic light scattering; ETP – etoposide; FA – folate acid; FACS – Fluorescence-Activated Cell Sorting; FA-PEG-DSPE – FA containing polyethylene glycol (PEG)-distearoylphosphatidylethanolamine (DSPE); FA-PEGPCHL – folate-poly(PEG-cyanoacrylate-co-cholesteryl cyanoacrylate); FA-SA – folic acid and stearic acid; Fol-PEG-CHEMS – Folate-polyethyleneglycol-cholesterol hemisuccinate; FTIR – Fourier transform infraRed spectroscopy; GMO – glyceryl monooleate; GMS – glyceryl monostearate; HA – hyaluronic acid; ICG – indocyanine green ; IFOS – ifosfamide; IMT – imatinib; Ir – irinotecan; Lapa –  $\beta$ -lapachone; LbL-PEG – layer-by-layer containing polyethylene glycol; LLS – laser light scattering; LPSA – laser particle size analyser; MCT – Medium fatty acids; MCTN – mechlorethamine; MTX – methotrexate; NAG – N-acetyl-d-glucosamine; NLC – nanostructured lipid carriers; NIR – near infrared; NMR – nuclear magnetic resonance spectroscopy; NTA – nanoparticle tracking analysis; OA – oleic acid; OXA – oxaliplatin; P-188 – poloxamer 188; PC – phosphatidylcholine; PCS – photon correlation spectroscopy; PDI – polydispersity index; PDT – photodynamic therapy; PEG – polyethylene glycol; PEG-40-St – Polyethylene glycol 40 stearate; PEG-FA – Polyethylene glycol-Folic acid; pEGFP – green fluorescence protein plasmid; PL – Platelet; PLM – polarized light microscopy; PRXD – powder X-Ray diffraction; PTX – Paclitaxel; PVA – polyvinyl alcohol; RBCm – Red blood cell-membrane; RDG – Arginine-glycine-aspartic acid peptide; RIPL – IPLVVPLRRRRRRRRC peptide; SA- Stearic acid; SAL – salinomycin; SA-PEG-FA – Stearic acid-PEG-folate; SA-R8– Stearyl-polyarginine; SAXS – Small-angle X-ray scattering; SC – sclareol; SiC – sildenafil citrate; SEM – Scanning electronic microscopy; SFN – sorafenib; SPC – soybean phosphatidylcholine; Static- STAT3 inhibitor; STEM-EDS – scanning transmission electron microscopy-energy dispersive X-ray spectroscopy; TAT – cell-penetrating peptide transcription activator; TEM – transmission electronic microscopy; Tf – Transferrin; Tf-PEG-PE – transferrin-Polyethylene glycol-phosphatidylethanolamine; TGA – thermogravimetric analysis; TGI – tumour growth inhibition; THP – pirarubicin; TMZ – temozolamide; TPT – topotecan; TS –  $\alpha$ -tocopherol succinate; VCR – vincristine sulphate; VTP – verteporfin; XRD – X-ray diffraction, XPS –X-ray photoelectron spectroscopy; ZnPc – Zinc phthalocyanine; ZP – zeta potential.

## References

1. Varshosaz, J.; Hassanzadeh, F.; Sadeghi, H.; Khadem, M. Galactosylated nanostructured lipid carriers for delivery of 5-FU to hepatocellular carcinoma. *J. Liposome Res.* **2012**, *22*, 224–236, doi:10.3109/08982104.2012.662653.
2. Rajinikanth, P.S.; Chellian, J. Development and evaluation of nanostructured lipid carrier-based hydrogel for topical delivery of 5-fluorouracil. *Int. J. Nanomedicine* **2016**, *11*, 5067–5077, doi:10.2147/IJN.S117511.
3. Amasya, G.; Aksu, B.; Badilli, U.; Onay-Besikci, A.; Tarimci, N. QbD guided early pharmaceutical development study: Production of lipid nanoparticles by high pressure homogenization for skin cancer treatment. *Int. J. Pharm.* **2019**, *563*, 110–121, doi:10.1016/j.ijpharm.2019.03.056.
4. Sharma, P.; Dube, B.; Sawant, K. Development and evaluation of nanostructured lipid carriers of cytarabine for treatment of meningeal leukemia. *J. Nanosci. Nanotechnol.* **2011**, *11*, 6676–6682, doi:10.1166/jnn.2011.4235.
5. Neupane, Y.R.; Srivastava, M.; Ahmad, N.; Kumar, N.; Bhatnagar, A.; Kohli, K. Lipid based nanocarrier system for the potential oral delivery of decitabine: Formulation design, characterization, ex vivo, and in vivo assessment. *Int. J. Pharm.* **2014**, *477*, 601–612, doi:10.1016/j.ijpharm.2014.11.001.
6. Abdelbary, G.; Haider, M. In vitro characterization and growth inhibition effect of nanostructured lipid carriers for controlled delivery of methotrexate. *Pharm. Dev. Technol.* **2013**, *18*, 1159–1168, doi:10.3109/10837450.2011.614251.

7. Ferreira, M.; Chaves, L.L.; Lima, S.C.; Reis, S. Optimization of nanostructured lipid carriers loaded with methotrexate : A tool for inflammatory and cancer therapy. *Int. J. Pharm.* **2015**, *492*, 65–72, doi:10.1016/j.ijpharm.2015.07.013.
8. Ong, Y.S.; Bañobre-López, M.; Costa Lima, S.A.; Reis, S. A multifunctional nanomedicine platform for co-delivery of methotrexate and mild hyperthermia towards breast cancer therapy. *Mater. Sci. Eng. C* **2020**, *116*, 111255–111268, doi:10.1016/j.msec.2020.111255.
9. Ferreira, M.; Silva, E.; Barreiros, L.; Segundo, M.A.; Costa Lima, S.A.; Reis, S. Methotrexate loaded lipid nanoparticles for topical management of skin-related diseases: Design, characterization and skin permeation potential. *Int. J. Pharm.* **2016**, *512*, 14–21, doi:10.1016/j.ijpharm.2016.08.008.
10. Chand, P.; Kumar, H.; Badduri, N.; Gupta, N.V.; Bettada, V.G.; Madhunapantula, S.R. V.; Kesharwani, S.S.; Dey, S.; Jain, V. Design and evaluation of cabazitaxel loaded NLCs against breast cancer cell lines. *Colloids Surfaces B Biointerfaces*. **2021**, *199*, 111535–111547, doi:10.1016/j.colsurfb.2020.111535.
11. Lee, S.G.; Kim, C.H.; Lee, E.S.; Goh, M.S; Yoon, H.Y.; Kang, M.J.; Lee, S.; Choi, Y.W. RIPL peptide-conjugated nanostructured lipid carriers for enhanced intracellular drug delivery to hepsin-expressing cancer cells. *Inter. J. Nanomedicine*. **2018**, 3263–3278, doi: 10.2147/IJN.S166021.
12. Gao, W.; Xiang, B.; Meng, T.T.; Liu, F.; Qi, X.R. Chemotherapeutic drug delivery to cancer cells using a combination of folate targeting and tumour microenvironment-sensitive polypeptides. *Biomaterials* **2013**, *34*, 4137–4149, doi:10.1016/j.biomaterials.2013.02.014.
13. Liu, D.; Liu, Z.; Wang, L.; Zhang, C.; Zhang, N. Nanostructured lipid carriers as novel carrier for parenteral delivery of docetaxel. *Colloids Surfaces B Biointerfaces*. **2011**, *85*, 262–269, doi:10.1016/j.colsurfb.2011.02.038.
14. Fang, G.; Tang, B.; Chao, Y.; Xu, H.; Gou, J.; Zhang, Y.; Xu, H.; Tang, X. Cysteine-Functionalized Nanostructured Lipid Carriers for Oral Delivery of Docetaxel: A Permeability and Pharmacokinetic Study. *Mol. Pharm.* **2015**, *12*, 2384–2395, doi:10.1021/acs.molpharmaceut.5b00081.
15. Kharkar, P.B.; Talkar, S.S.; Patravale, V.B. An industrially viable technique for fabrication of docetaxel NLCs for oncotherapy. *Int. J. Pharm.* **2020**, *577*, 119082–119091, doi:10.1016/j.ijpharm.2020.119082.
16. Kim, C.H.; Kang, T.H.; Kim, B.D.; Lee, T.H.; Yoon, H.Y.; Goo, Y.T.; Choi, Y.S.; Kang, M.J.; Choi, Y.W. Enhanced docetaxel delivery using sterically stabilized RIPL peptide-conjugated nanostructured lipid carriers: In vitro and in vivo antitumour efficacy against SKOV3 ovarian cancer cells. *Int. J. Pharm.* **2020**, *583*, 119393–119404, doi:10.1016/j.ijpharm.2020.119393.
17. Li, X.; Wang, D.; Zhang, J.; Pan, W. Preparation and pharmacokinetics of docetaxel based on nanostructured lipid carriers. *J. Pharm. Pharmacol.* **2009**, *61*, 1485–1492, doi:10.1211/jpp/61.11.0007.
18. Li, M.; Pei, J.; Ma, Z.; Fu, J.; Chen, F.; Du, S. Docetaxel-loaded ultrasmall nanostructured lipid carriers for cancer therapy: in vitro and in vivo evaluation. *Cancer Chemother. Pharmacol.* **2020**, *85*, 731–739, doi:10.1007/s00280-020-04048-6.

19. Liu, D.; Liu, F.; Liu, Z.; Wang, L.; Zhang, N. Tumour specific delivery and therapy by double-targeted nanostructured lipid carriers with anti-VEGFR-2 antibody. *Mol. Pharm.* **2011**, *8*, 2291–2301, doi:10.1021/mp200402e.
20. Mathur, P.; Sharma, S.; Rawal, S.; Patel, B.; Patel, M.M. Fabrication, optimization, and in vitro evaluation of docetaxel-loaded nanostructured lipid carriers for improved anticancer activity. *J. Liposome Res.* **2020**, *30*, 182–196, doi:10.1080/08982104.2019.1614055.
21. Vohra, T.; Kaur, I.; Heer, H.; Murthy, R.R. Nanolipid carrier-based thermoreversible gel for localized delivery of docetaxel to breast cancer. *Cancer Nanotechnol.* **2013**, *4*, 1–12, doi:10.1007/s12645-013-0032-9.
22. Zhao, X.; Zhao, Y.; Geng, L.; Li, X.; Wang, X.; Liu, Z.; Wang, D.; Bi, K.; Chen, X. Pharmacokinetics and tissue distribution of docetaxel by liquid chromatography-mass spectrometry: Evaluation of folate receptor-targeting amphiphilic copolymer modified nanostructured lipid carrier. *J. Chromatogr. B.* **2011**, *879*, 3721–3727, doi:10.1016/j.jchromb.2011.10.015.
23. Zwain, T.; Alder, J.E.; Sabagh, B.; Shaw, A.; Burrow, A.J.; Singh, K.K. Tailoring functional nanostructured lipid carriers for glioblastoma treatment with enhanced permeability through in-vitro 3D BBB/BBTB models. *Mater. Sci. Eng. C* **2021**, *121*, 111774–111789, doi:10.1016/j.msec.2020.111774.
24. Fan, X.; Chen, J.; Shen, Q. Docetaxel-nicotinamide complex-loaded nanostructured lipid carriers for transdermal delivery. *Int. J. Pharm.* **2013**, *458*, 296–304, doi:10.1016/j.ijpharm.2013.10.036.
25. Bang, K.H.; Na, Y.G.; Huh, H.W.; Hwang, S.J.; Kim, M.S.; Kim, M.; Lee, H.K.; Cho, C.W. The delivery strategy of paclitaxel nanostructured lipid carrier coated with platelet membrane. *Cancers.* **2019**, *11*, 807–822, doi:10.3390/cancers11060807.
26. Chen, J.; Chen, H.; Cui, S.; Xue, B.; Tian, J.; Achilefu, S.; Gu, Y. Glucosamine derivative modified nanostructured lipid carriers for targeted tumour delivery. *J. Mater. Chem.* **2012**, *22*, 5770–5783, doi:10.1039/c2jm15830b.
27. Emami, J.; Rezazadeh, M.; Varshosaz, J.; Tabbakhian, M.; Aslani, A. Formulation of LDL targeted nanostructured lipid carriers loaded with paclitaxel: A detailed study of preparation, freeze drying condition, and in vitro cytotoxicity. *J. Nanomater.* **2012**, *2012*, 21–30, doi:10.1155/2012/358782.
28. Harshita; Barkat, M.A.; Rizwanullah, M.; Beg, S.; Potttoo, F.H.; Siddiqui, S.; Ahmad, F.J. Paclitaxel-loaded Nanolipidic Carriers with Improved Oral Bioavailability and Anticancer Activity against Human Liver Carcinoma. *AAPS PharmSciTech* **2019**, *20*, 87 doi:10.1208/s12249-019-1304-4.
29. Kaur, P.; Garg, T.; Rath, G.; Murthy, R.S.R.; Goyal, A.K. Development, optimization and evaluation of surfactant-based pulmonary nanolipid carrier system of paclitaxel for the management of drug resistance lung cancer using Box-Behnken design. *Drug Deliv.* **2016**, *23*, 1912–1925, doi:10.3109/10717544.2014.993486.
30. de Sousa Marcial, S.P.; Carneiro, G.; Leite, E.A. Lipid-based nanoparticles as drug delivery system for paclitaxel in breast cancer treatment. *J. Nanoparticle Res.* **2017**, *19*, 340 doi:10.1007/s11051-017-4042-0.

31. Sun, M.; Gao, Y.; Zhu, Z.; Wang, H.; Han, C.; Yang, X.; Pan, W. A systematic in vitro investigation on poly-arginine modified nanostructured lipid carrier: Pharmaceutical characteristics, cellular uptake, mechanisms and cytotoxicity. *Asian J. Pharm. Sci.* **2017**, *12*, 51–58, doi:10.1016/j.ajps.2016.07.007.
32. Ucar, E.; Teksoz, S.; Ichedef, C.; Kilcar, A.Y.; Medine, E.I.; Ari, K.; Parlak, Y.; Sayit Bilgin, B.E.; Unak, P. Synthesis, characterization and radiolabeling of folic acid modified nanostructured lipid carriers as a contrast agent and drug delivery system. *Appl. Radiat. Isot.* **2017**, *119*, 72–79, doi:10.1016/j.apradiso.2016.11.002.
33. Yang, X. yan; Li, Y. xia; Li, M.; Zhang, L.; Feng, L. xia; Zhang, N. Hyaluronic acid-coated nanostructured lipid carriers for targeting paclitaxel to cancer. *Cancer Lett.* **2013**, *334*, 338–345, doi:10.1016/j.canlet.2012.07.002.
34. Zhao, X.; Tang, D.; Yang, T.; Wang, C. Facile preparation of biocompatible nanostructured lipid carrier with ultra-small size as a tumour-penetration delivery system. *Colloids Surfaces B Biointerfaces* 2018, *170*, 355–363, doi: 10.1016/j.colsurfb.2018.06.017.
35. Zhou, J.; Guo, B.; Zhu, W.; Sui, X.; Ma, X.; Qian, J.; Cao, L.; Han, C. Novel biomimetic nanostructured lipid carriers for cancer therapy: preparation, characterization, and in vitro/in vivo evaluation. *Pharm. Dev. Technol.* **2021**, *26*, 81–91, doi:10.1080/10837450.2020.1835957.
36. Emami, J.; Rezazadeh, M.; Sadeghi, H.; Khadivar, K. Development and optimization of transferrin-conjugated nanostructured lipid carriers for brain delivery of paclitaxel using Box–Behnken design. *Pharm. Dev. Technol.* **2017**, *22*, 370–382, doi:10.1080/10837450.2016.1189933.
37. Gao, X.; Zhang, J.; Xu, Q.; Huang, Z.; Wang, Y.; Shen, Q. Hyaluronic acid-coated cationic nanostructured lipid carriers for oral vincristine sulfate delivery. *Drug Dev. Ind. Pharm.* **2017**, *43*, 661–667, doi:10.1080/03639045.2016.1275671.
38. Zhang, G.; Liu, F.; Jia, E.; Jia, L.; Zhang, Y. Folate-modified , cisplatin-loaded lipid carriers for cervical cancer chemotherapy. *Drug Deliv.* **2016**, *23*, 1393–1397, doi:10.3109/10717544.2015.1054052.
39. Zhang, Y.; Zhang, P.; Zhu, T. Ovarian carcinoma biological nanotherapy : Comparison of the advantages and drawbacks of lipid, polymeric and hybrid nanoparticles for cisplatin delivery. *Biomed. Pharmacother.* **2019**, *109*, 475–483, doi:10.1016/j.biopha.2018.10.158.
40. Almoussalam, M.; Zhu, H. Encapsulation of Cancer Therapeutic Agent Dacarbazine Using Nanostructured Lipid Carrier. **2016**, 53760 doi:10.3791/53760.
41. Velmurugan, R.; Selvamuthukumar, S. Development and optimization of ifosfamide nanostructured lipid carriers for oral delivery using response surface methodology. *Appl. Nanosci.* **2016**, *6*, 159–173, doi:10.1007/s13204-015-0434-6.
42. Velmurugan, R.; Selvamuthukumar, S. In Vivo Antitumour Activity of a Novel Orally Bioavailable Ifosfamide Nanostructured Lipid Carrier Against Dalton’s Ascitic Lymphoma. *J. Pharm. Innov.* **2014**, *9*, 203–211, doi:10.1007/s12247-014-9187-0.

43. Velmurugan, R.; Nair, K.G.S. Toxicity evaluation of ifosfamide nanostructured lipid carriers designed for oral delivery in Wistar albino rats. *Drug Invent. Today*. **2018**, *10*, 192–196
44. Gidwani, B.; Vyas, A.; Kaur, C.D. Cytotoxicity and pharmacokinetics study of nanostructured lipid carriers of mechlorethamine: Preparation, optimization and characterization. *Part. Sci. Technol.* **2020**, *38*, 23–33, doi:10.1080/02726351.2018.1536685.
45. Khan, A.; Imam, S.S.; Aqil, M.; Ahad, A.; Sultana, Y.; Ali, A.; Khan, K. Brain Targeting of Temozolomide via the Intranasal Route Using Lipid-Based Nanoparticles: Brain Pharmacokinetic and Scintigraphic Analyses. *Mol. Pharmaceutics*. **2016**, *13*, 3773–3782, doi:10.1021/acs.molpharmaceut.6b00586.
46. Qu, J.; Zhang, L.; Chen, Z.; Mao, G.; Gao, Z.; Lai, X.; Zhu, X.; Zhu, J. Nanostructured lipid carriers, solid lipid nanoparticles, and polymeric nanoparticles: which kind of drug delivery system is better for glioblastoma chemotherapy? *Drug Deliv.* **2016**, *23*, 3408–3416, doi:10.1080/10717544.2016.1189465.
47. Chen, Z.; Lai, X.; Song, S.; Zhu, X.; Zhu, J. Nanostructured lipid carriers based temozolomide and gene co-encapsulated nanomedicine for gliomatosis cerebri combination therapy. *Drug Deliv.* **2016**, *23*, 1369–1373, doi:10.3109/10717544.2015.1038857.
48. Song, S.; Mao, G.; Du, J.; Zhu, X. Novel RGD containing, temozolomide-loading nanostructured lipid carriers for glioblastoma multiforme chemotherapy. *Drug Deliv.* **2016**, *23*, 1404–1408, doi:10.3109/10717544.2015.1064186.
49. Raeisi, S.; Chavoshi, H.; Mohammadi, M.; Ghorbani, M.; Sabzichi, M.; Ramezani, F. Naringenin-loaded nano-structured lipid carrier fortifies oxaliplatin-dependent apoptosis in HT-29 cell line. *Process Biochem.* **2019**, *83*, 168–175, doi:10.1016/j.procbio.2019.05.013.
50. Abdolahpour, S.; Mahdiah, N.; Jamali, Z.; Akbarzadeh, A.; Toliyat, T.; Paknejad, M. Development of Doxorubicin-Loaded Nanostructured Lipid Carriers: Preparation, Characterization, and In Vitro Evaluation on MCF-7 Cell Line. *Bionanoscience* **2017**, *7*, 32–39, doi:10.1007/s12668-016-0391-x.
51. Fernandes, R.S.; Silva, J.O.; Monteiro, L.O.F.; Leite, E.A.; Cassali, G.D.; Rubello, D.; Cardoso, V.N.; Ferreira, L.A.M.; Oliveira, M.C.; de Barros, A.L.B. Doxorubicin-loaded nanocarriers: A comparative study of liposome and nanostructured lipid carrier as alternatives for cancer therapy. *Biomed. Pharmacother.* **2016**, *84*, 252–257, doi:10.1016/j.biopha.2016.09.032.
52. Fernandes, R.S.; Silva, J.O.; Mussi, S. V.; Lopes, S.C.A.; Leite, E.A.; Cassali, G.D.; Cardoso, V.N.; Townsend, D.M.; Colletti, P.M.; Ferreira, L.A.M.; et al. Nanostructured Lipid Carrier Co-loaded with Doxorubicin and Docosahexaenoic Acid as a Theranostic Agent: Evaluation of Biodistribution and Antitumour Activity in Experimental Model. *Mol. Imaging Biol.* **2018**, *20*, 437–447, doi:10.1007/s11307-017-1133-3.
53. Fernandes, R.S.; Silva, J.O.; Seabra, H.A.; Oliveira, M.S.; Carregal, V.M.; Vilela, J.M.C.; Andrade, M.S.; Townsend, D.M.; Colletti, P.M.; Leite, E.A.; Cardoso, V.N.; Ferreira, L.A.M.; Rubello D.; Barros, A.L.B.  $\alpha$ -Tocopherol succinate loaded nano-structured lipid carriers improves antitumour activity of doxorubicin in breast cancer models in vivo. *Biomed. Pharmacother.* **2018**, *103*, 1348–1354, doi:10.1016/j.biopha.2018.04.139.
54. Hajipour, H.; Ghorbani, M.; Kahroba, H.; Mahmoodzadeh, F.; Enameh, R.Z.; Taheri, R.A. Arginyl-glycyl-aspartic acid (RGD) containing



- nanostructured lipid carrier co-loaded with doxorubicin and sildenafil citrate enhanced anti-cancer effects and overcomes drug resistance. *Process Biochem.* **2019**, *84*, 172–179, doi:10.1016/j.procbio.2019.06.013.
55. Han, Y.; Zhang, Y.; Li, D.; Chen, Y.; Sun, J.; Kong, F. Transferrin-modified nanostructured lipid carriers as multifunctional nanomedicine for codelivery of DNA and doxorubicin. *Int. J. Nanomedicine* **2014**, *9*, 4107–4116, doi:10.2147/IJN.S67770.
  56. Lages, E.B.; Fernandes, R.S.; Silva, J. de O.; de Souza, Â.M.; Cassali, G.D.; de Barros, A.L.B.; Miranda Ferreira, L.A. Co-delivery of doxorubicin, docosahexaenoic acid, and  $\alpha$ -tocopherol succinate by nanostructured lipid carriers has a synergistic effect to enhance antitumour activity and reduce toxicity. *Biomed. Pharmacother.* **2020**, *132*, 110876–110887, doi:10.1016/j.biopha.2020.110876.
  57. Li, W.; Fu, J.; Ding, Y.; Liu, D.; Jia, N.; Chen, D.; Hu, H. Low density lipoprotein-inspired nanostructured lipid nanoparticles containing pro-doxorubicin to enhance tumour-targeted therapeutic efficiency. *Acta Biomater.* **2019**, *96*, 456–467, doi:10.1016/j.actbio.2019.06.051.
  58. Mohammadian, J.; Mahmoudi, S.; Pourmohammad, P.; Pirouzpanah, M.; Salehnia, F.; Maroufi, N.F.; Samadi, N.; Sabzichi, M. Formulation of Stattic as STAT3 inhibitor in nanostructured lipid carriers (NLCs) enhances efficacy of doxorubicin in melanoma cancer cells. *Naunyn. Schmiedeberg's Arch. Pharmacol.* **2020**, *393*, 2315–2323, doi:10.1007/s00210-020-01942-x.
  59. Moraes, S.; Marinho, A.; Lima, S.; Granja, A.; Araújo, J.P.; Reis, S.; Sousa, C.T.; Nunes, C. Targeted nanostructured lipid carriers for doxorubicin oral delivery. *Int. J. Pharm.* **2021**, *592*, 120029–120039, doi:10.1016/j.ijpharm.2020.120029.
  60. Mussi, S. V.; Sawant, R.; Perche, F.; Oliveira, M.C.; Azevedo, R.B.; Ferreira, L.A.M.; Torchilin, V.P. Novel nanostructured lipid carrier co-loaded with doxorubicin and docosahexaenoic acid demonstrates enhanced in vitro activity and overcomes drug resistance in MCF-7/Adr cells. *Pharm. Res.* **2014**, *31*, 1882–1892, doi:10.1007/s11095-013-1290-2.
  61. Mussi, S. V.; Parekh, G.; Pattekari, P.; Levchenko, T.; Lvov, Y.; Ferreira, L.A.M.; Torchilin, V.P. Improved pharmacokinetics and enhanced tumour growth inhibition using a nanostructured lipid carrier loaded with doxorubicin and modified with a layer-by-layer polyelectrolyte coating. *Int. J. Pharm.* **2015**, *495*, 186–193, doi:10.1016/j.ijpharm.2015.08.079.
  62. Sabzichi, M.; Mohammadian, J.; Mohammadi, M.; Jahanfar, F.; Movassagh Pour, A.A.; Hamishehkar, H.; Ostad-Rahimi, A. Vitamin D-Loaded Nanostructured Lipid Carrier (NLC): A New Strategy for Enhancing Efficacy of Doxorubicin in Breast Cancer Treatment. *Nutr. Cancer* **2017**, *69*, 840–848, doi:10.1080/01635581.2017.1339820.
  63. Zhang, H.W.; Dang, Q.; Zhang, Z.W.; Wu, F.S. Development, characterization and evaluation of doxorubicin nanostructured lipid carriers for prostate cancer. *J. BUON.* **2017**, *22*, 102–111.
  64. Zhao, S.; Minh, L. Van; Li, N.; Garamus, V.M.; Handge, U.A.; Liu, J.; Zhang, R.; Willumeit-Römer, R.; Zou, A. Doxorubicin hydrochloride-oleic acid conjugate loaded nanostructured lipid carriers for tumour specific drug release. *Colloids Surfaces B Biointerfaces* **2016**, *145*, 95–103,

doi:10.1016/j.colsurfb.2016.04.027.

65. Deng, C.; Jia, M.; Wei, G.; Tan, T.; Fu, Y.; Gao, H.; Sun, X.; Zhang, Q.; Gong, T.; Zhang, Z. Inducing Optimal Antitumour Immune Response through Coadministering iRGD with Pirarubicin Loaded Nanostructured Lipid Carriers for Breast Cancer Therapy. *Mol. Pharm.* **2017**, *14*, 296–309, doi:10.1021/acs.molpharmaceut.6b00932.
66. Negi, L.M.; Talegaonkar, S.; Jaggi, M.; Verma, A.K.; Verma, R.; Dobhal, S.; Kumar, V. Surface engineered nanostructured lipid carriers for targeting MDR tumour: Part II. In vivo biodistribution, pharmacodynamic and hematological toxicity studies. *Colloids Surfaces B Biointerfaces* **2014**, *123*, 610–615, doi:10.1016/j.colsurfb.2014.09.061
67. Negi, L.M.; Talegaonkar, S.; Jaggi, M.; Verma, A.K.; Verma, R.; Dobhal, S.; Kumar, V. Surface engineered nanostructured lipid carriers for targeting MDR tumour: Part I. Synthesis, characterization and in vitro investigation. *Colloids Surfaces B Biointerfaces* **2014**, *123*, 600–609, doi:10.1016/J.COLSURFB.2014.09.062.
68. Jiang, H.; Pei, L.; Liu, N.; Li, J.; Li, Z.; Zhang, S. Etoposide-loaded nanostructured lipid carriers for gastric cancer therapy. *Drug Deliv.* **2016**, *23*, 1379–1382, doi:10.3109/10717544.2015.1048491.
69. Khajavinia, A.; Varshosaz, J.; Dehkordi, A.J. Targeting etoposide to acute myelogenous leukaemia cells using nanostructured lipid carriers coated with transferrin. *Nanotechnology* **2012**, *23*, 405101–405114, doi:10.1088/0957-4484/23/40/405101.
70. Wang, H.; Sun, G.; Zhang, Z.; Ou, Y. Transcription activator, hyaluronic acid and tocopheryl succinate multi-functionalized novel lipid carriers encapsulating etoposide for lymphoma therapy. *Biomed. Pharmacother.* **2017**, *91*, 241–250, doi:10.1016/j.biopha.2017.04.104.
71. Zhang, T.; Chen, J.; Zhang, Y.; Shen, Q.; Pan, W. Characterization and evaluation of nanostructured lipid carrier as a vehicle for oral delivery of etoposide. *Eur. J. Pharm. Sci.* **2011**, *43*, 174–179, doi:10.1016/j.ejps.2011.04.005.
72. Zhang, S.; Lu, C.; Zhang, X.; Li, J.; Jiang, H. Targeted delivery of etoposide to cancer cells by folate-modified nanostructured lipid drug delivery system. *Drug Deliv.* **2016**, *23*, 1838–1845, doi:10.3109/10717544.2016.1141258.
73. Venâncio, J.H.; Andrade, L.M.; Esteves, N.L.S.; Brito, L.B.; Valadares, M.C.; Oliveira, G.A.R.; Lima, E.M.; Marreto, R.N.; Gratieri, T.; Taveira, S.F. Topotecan-loaded lipid nanoparticles as a viable tool for the topical treatment of skin cancers. *J. Pharm. Pharmacol.* **2017**, *69*, 1318–1326, doi:10.1111/jphp.12772.
74. Kaur, P.; Mishra, V.; Shunmugaperumal, T.; Goyal, A.K.; Ghosh, G.; Rath, G. Inhalable spray dried lipidnanoparticles for the co-delivery of paclitaxel and doxorubicin in lung cancer. *J. Drug Deliv. Sci. Technol.* **2020**, *56*, 101502–101511, doi:10.1016/j.jddst.2020.101502.
75. Wang, Y.; Zhang, H.; Hao, J.; Li, B.; Li, M.; Xiuwen, W. Lung cancer combination therapy: co-delivery of paclitaxel and doxorubicin by nanostructured lipid carriers for synergistic effect. *Drug Deliv.* **2016**, *23*, 1398–1403, doi:10.3109/10717544.2015.1055619.

76. Zhang, X.G.; Miao, J.; Dai, Y.Q.; Du, Y.Z.; Yuan, H.; Hu, F.Q. Reversal activity of nanostructured lipid carriers loading cytotoxic drug in multi-drug resistant cancer cells. *Int. J. Pharm.* **2008**, *361*, 239–244, doi:10.1016/j.ijpharm.2008.06.002.
77. Raikwar, S.; Vyas, S.; Sharma, R.; Mody, N.; Dubey, S.; Vyas, S.P. Nanocarrier-Based Combination Chemotherapy for Resistant Tumour: Development, Characterization, and Ex Vivo Cytotoxicity Assessment. *AAPS PharmSciTech* **2018**, *19*, 3839–3849, doi:10.1208/s12249-018-1185-y.
78. Chang, L.; Zhang, Y.; Li, M.; Zhao, X.; Wang, D.; Liu, J.; Zhou, F.; Zhang, J. Nanostructured lipid carrier co-delivering paclitaxel and doxorubicin restrains the proliferation and promotes apoptosis of glioma stem cells via regulating PI3K/Akt/mTOR signaling. *Nanotechnology* **2021**, *32*, 225101–225113, doi:10.1088/1361-6528/abd439.
79. Di, H.; Wu, H.; Gao, Y.; Li, W.; Zou, D.; Dong, C. Doxorubicin- and cisplatin-loaded nanostructured lipid carriers for breast cancer combination chemotherapy. *Drug Dev. Ind. Pharm.* **2016**, *42*, 2038–2043, doi:10.1080/03639045.2016.1190743.
80. Dong, X.; Wang, W.; Qu, H.; Han, D.; Zheng, J.; Sun, G. Targeted delivery of doxorubicin and vincristine to lymph cancer: evaluation of novel nanostructured lipid carriers in vitro and in vivo. *Drug Deliv.* **2016**, *23*, 1374–1378, doi:10.3109/10717544.2015.1041580.
81. Ni, S.; Qiu, L.; Zhang, G.; Zhou, H.; Han, Y. Lymph cancer chemotherapy: Delivery of doxorubicin-gemcitabine prodrug and vincristine by nanostructured lipid carriers. *Int. J. Nanomedicine* **2017**, *12*, 1565–1576, doi:10.2147/IJN.S120685.
82. Liu, Q.; Li, J.; Pu, G.; Zhang, F.; Liu, H.; Zhang, Y. Co-delivery of baicalein and doxorubicin by hyaluronic acid decorated nanostructured lipid carriers for breast cancer therapy. *Drug Deliv.* **2016**, *23*, 1364–1368, doi:10.3109/10717544.2015.1031295.
83. Borges, G.S.M.; Silva, J. de O.; Fernandes, R.S.; de Souza, Â.M.; Cassali, G.D.; Yoshida, M.I.; Leite, E.A.; de Barros, A.L.B.; Ferreira, L.A.M. Sclareol is a potent enhancer of doxorubicin: Evaluation of the free combination and co-loaded nanostructured lipid carriers against breast cancer. *Life Sci.* **2019**, *232*, 116678–116690, doi:10.1016/j.lfs.2019.116678.
84. Cao, C.; Wang, Q.; Liu, Y. Lung cancer combination therapy: Doxorubicin and  $\beta$ -elemene co-loaded, pH-sensitive nanostructured lipid carriers. *Drug Des. Devel. Ther.* **2019**, *13*, 1087–1098, doi:10.2147/DDDT.S198003.
85. Li, X.; Jia, X.; Niu, H. Nanostructured lipid carriers co-delivering lapachone and doxorubicin for overcoming multidrug resistance in breast cancer therapy. *Int. J. Nanomedicine* **2018**, *13*, 4107–4119, doi:10.2147/IJN.S163929.
86. Yang, J.; Ju, Z.; Dong, S. Cisplatin and paclitaxel co-delivered by folate-decorated lipid carriers for the treatment of head and neck cancer. *Drug Deliv.* **2017**, *24*, 792–799, doi:10.1080/10717544.2016.1236849.
87. Guo, S.; Zhang, Y.; Wu, Z.; Zhang, L.; He, D.; Li, X.; Wang, Z. Synergistic combination therapy of lung cancer: Cetuximab functionalized nanostructured lipid carriers for the co-delivery of paclitaxel and 5-Demethylnobiletin. *Biomed. Pharmacother.* **2019**, *118*, 109225–109232, doi:10.1016/j.biopha.2019.109225.

88. Qu, C.-Y.Y.; Zhou, M.; Chen, Y.W.; Chen, M.M.; Shen, F.; Xu, L.-M.M. Engineering of lipid prodrug-based, hyaluronic acid-decorated nanostructured lipid carriers platform for 5-fluorouracil and cisplatin combination gastric cancer therapy. *Int. J. Nanomedicine* **2015**, *10*, 3911–3920, doi:10.2147/IJN.S83211.
89. Wu, M.; Fan, Y.; Lv, S.; Xiao, B.; Ye, M.; Zhu, X. Vincristine and temozolomide combined chemotherapy for the treatment of glioma: a comparison of solid lipid nanoparticles and nanostructured lipid carriers for dual drugs delivery. *Drug Deliv.* **2016**, *23*, 2720–2725, doi:10.3109/10717544.2015.1058434.
90. Zhang, J.; Xiao, X.; Zhu, J.; Gao, Z.; Lai, X.; Zhu, X.; Mao, G. Lactoferrin- and RGD-comodified, temozolomide and vincristine-coloaded nanostructured lipid carriers for gliomatosis cerebri combination therapy. *Int. J. Nanomedicine* **2018**, *13*, 3039–3051, doi:10.2147/IJN.S161163.
91. Liang, Y.; Zhang, J.; Tian, B.; Wu, Z.; Svirskis, D.; Han, J. A NAG-guided nano-delivery system for redox-and pH-triggered intracellularly sequential drug release in cancer cells. *Int. J. Nanomedicine* **2020**, *15*, 841–855, doi:10.2147/IJN.S226249.
92. Liang, Y.; Tian, B.; Zhang, J.; Li, K.; Wang, L.; Han, J.; Wu, Z. Tumour-targeted polymeric nanostructured lipid carriers with precise ratiometric control over dual-drug loading for combination therapy in non-small-cell lung cancer. *Int. J. Nanomedicine* **2017**, *12*, 1699–1715, doi:10.2147/IJN.S121262.
93. Lu, Z.; Su, J.; Li, Z.; Zhan, Y.; Ye, D. Hyaluronic acid-coated, prodrug-based nanostructured lipid carriers for enhanced pancreatic cancer therapy. *Drug Dev. Ind. Pharm.* **2017**, *43*, 160–170, doi:10.1080/03639045.2016.1226337.
94. Zhou, J.; Sun, M.; Jin, S.; Fan, L.; Zhu, W.; Sui, X.; Cao, L.; Yang, C.; Han, C. Combined using of paclitaxel and salinomycin active targeting nanostructured lipid carriers against non-small cell lung cancer and cancer stem cells. *Drug Deliv.* **2019**, *26*, 281–289, doi:10.1080/10717544.2019.1580799.
95. Taratula, O.; Kuzmov, A.; Shah, M.; Garbuzenko, O.B.; Minko, T. Nanostructured lipid carriers as multifunctional nanomedicine platform for pulmonary co-delivery of anticancer drugs and siRNA. *J. Control. Release* **2013**, *171*, 349–357, doi:10.1016/j.jconrel.2013.04.018.
96. Shao, Z.; Shao, J.; Tan, B.; Guan, S.; Liu, Z.; Zhao, Z.; He, F.; Zhao, J. Targeted lung cancer therapy: Preparation and optimization of transferrin-decorated nanostructured lipid carriers as novel nanomedicine for co-delivery of anticancer drugs and DNA. *Int. J. Nanomedicine* **2015**, *10*, 1223–1233, doi:10.2147/IJN.S77837.
97. Wang, J.Y.; Song, Y.Q.; Peng, J.; Luo, H.L. Nanostructured lipid carriers delivering sorafenib to enhance immunotherapy induced by doxorubicin for effective esophagus cancer therapy. *ACS Omega* **2020**, *5*, 22840–22846, doi:10.1021/acsomega.0c02072.
98. Mahoutforoush, A.; Solouk, A.; Hamishehkar, H.; Haghbin Nazarpak, M.; Abbaspour-Ravasjani, S. Novel decorated nanostructured lipid carrier for simultaneous active targeting of three anti-cancer agents. *Life Sci.* **2021**, *279*, 119576–119589, doi:10.1016/J.LFS.2021.119576.
99. Varshosaz, J.; Davoudi, M.A.; Rasoul-Amini, S. Docetaxel-loaded nanostructured lipid carriers functionalized with trastuzumab (Herceptin) for HER2-

- positive breast cancer cells. *J. Liposome Res.* **2018**, *28*, 285–295, doi:10.1080/08982104.2017.1370471.
100. Maroufi, N.F.; Vahedian, V.; Mazrakhondi, S.A.M.; Kooti, W.; Khiavy, H.A.; Bazzaz, R.; Ramezani, F.; Pirouzpanah, S.M.; Ghorbani, M.; Akbarzadeh, M.; et al. Sensitization of MDA-MBA231 breast cancer cell to docetaxel by myricetin loaded into biocompatible lipid nanoparticles via sub-G1 cell cycle arrest mechanism. *Naunyn. Schmiedeberg's Arch. Pharmacol.* **2020**, *393*, 1–11, doi:10.1007/s00210-019-01692-5.
  101. Bondi, M.L.; Emma, M.R.; Botto, C.; Augello, G.; Azzolina, A.; Gaudio, F. Di; Craparo, E.F.; Cavallaro, G.; Bachvarov, D.; Cervello, M. Biocompatible Lipid Nanoparticles as Carriers To Improve Curcumin Efficacy in Ovarian Cancer Treatment. *J. Agric. Food Chem.* **2017**, *65*, 1342–1352, doi:10.1021/ACS.JAFC.6B04409.
  102. Bondi, M.; Craparo, E.; Picone, P.; Carlo, M.; Gesu, R.; Capuano, G.; Giammona, G. Curcumin Entrapped Into Lipid Nanosystems Inhibits Neuroblastoma Cancer Cell Growth and Activates Hsp70 Protein. *Curr. Nanosci.* **2010**, *6*, 439–445, doi:10.2174/157341310797575005.
  103. Wang, F.; Chen, J.; Dai, W.; He, Z.; Zhai, D.; Chen, W. Pharmacokinetic studies and anticancer activity of curcumin-loaded nanostructured lipid carriers. *Acta Pharm.* **2017**, *67*, 357–371, doi:10.1515/acph-2017-0021.
  104. Wang, F.; Ye, X.; Zhai, D.; Dai, W.; Wu, Y.; Chen, J.; Chen, W. Curcumin-loaded nanostructured lipid carrier induced apoptosis in human HepG2 cells through activation of the DR5/caspase-mediated extrinsic apoptosis pathway. *Acta Pharm.* **2020**, *70*, 227–237, doi:10.2478/ACPH-2020-0003.
  105. Karami, S.; Rostamizadeh, K.; Shademani, N.; Parsa, M. Synthesis and Investigation of the Curcumin-Loaded Magnetic Lipid Nanoparticles and Their Cytotoxicity Assessment on Human Breast Carcinoma Cell Line. *Jundishapur J. Nat. Pharm. Prod.* **2020**, *15*, doi:10.5812/JJNPP.91886.
  106. Chen, Y.; Pan, L.; Jiang, M.; Li, D.; Jin, L. Nanostructured lipid carriers enhance the bioavailability and brain cancer inhibitory efficacy of curcumin both in vitro and in vivo. *Drug Deliv.* **2015**, *23*, 1383–1392, doi:10.3109/10717544.2015.1049719.
  107. Kamel, A.E.; Fadel, M.; Louis, D. Curcumin-loaded nanostructured lipid carriers prepared using Peceol™ and olive oil in photodynamic therapy: development and application in breast cancer cell line. *Int J. Nanomedicine* **2019**, *14*, 5073–5085, doi:10.2147/IJN.S210484.
  108. Varshosaz, J.; Jandaghian, S.; Mirian, M.; Sajjadi, S.E. Co-delivery of rituximab targeted curcumin and imatinib nanostructured lipid carriers in non-Hodgkin lymphoma cells. *J. Liposome Res.* **2020**, *31*, 64–78, doi:10.1080/08982104.2020.1720718.
  109. Rawal, S.; Patel, B.; Patel, M.M. Fabrication, optimisation and in vitro evaluation of docetaxel and curcumin Co-loaded nanostructured lipid carriers for improved antitumour activity against non-small cell lung carcinoma. *J. Microencapsul.* **2020**, *37*, 543–556, doi:10.1080/02652048.2020.1823498.
  110. Rawal, S.; Bora, V.; Patel, B.; Patel, M. Surface-engineered nanostructured lipid carrier systems for synergistic combination oncotherapy of non-small cell lung cancer. *Drug Deliv. Transl. Res.* **2020**, *11*, 2030–2051, doi:10.1007/s13346-020-00866-6.
  111. Xu, M.; Li, G.; Zhang, H.; Chen, X.; Li, Y. Sequential delivery of dual drugs with nanostructured lipid carriers for improving synergistic tumour

treatment effect. *Drug Deliv.* **2020**, 27, 983-995, doi:10.1080/10717544.2020.1785581.

112. Almeida, E.D.P.; Dipieri, L. V.; Rossetti, F.C.; Marchetti, J.M.; Bentley, M.V.L.B.; Nunes, R. de S.; Sarmento, V.H. V.; Valerio, M.E.G.; Rodrigues Júnior, J.J.; Montalvão, M.M.; et al. Skin permeation, biocompatibility and antitumour effect of chloroaluminum phthalocyanine associated to oleic acid in lipid nanoparticles. *Photodiagnosis Photodyn. Ther.* **2018**, 24, 262–273, doi:10.1016/j.pdpdt.2018.10.002.
113. Chen, G.; Wang, K.; Zhou, Y.; Ding, L.; Ullah, A.; Hu, Q.; Sun, M.; Oupický, D. Oral Nanostructured Lipid Carriers Loaded with Near-Infrared Dye for Image-Guided Photothermal Therapy. *ACS Appl. Mater. Interfaces* **2016**, 8, 25087–25095, doi:10.1021/acsami.6b07425.
114. Li, H.; Wang, K.; Yang, X.; Zhou, Y.; Ping, Q.; Oupický, D.; Sun, M. Dual-function nanostructured lipid carriers to deliver IR780 for breast cancer treatment: Anti-metastatic and photothermal anti-tumour therapy. *Acta Biomater.* **2017**, 53, 399–413, doi:10.1016/j.actbio.2017.01.070.
115. Michy; Massias; Bernard; Vanwonderghem; Henry; Guidetti; Royal; Coll; Texier; Josserand; et al. Verteporfin-Loaded Lipid Nanoparticles Improve Ovarian Cancer Photodynamic Therapy In Vitro and In Vivo. *Cancers (Basel).* **2019**, 11, 1760–1778, doi:10.3390/cancers11111760.
116. Oshiro-Junior, J.A.; Sato, M.R.; Boni, F.I.; Santos, K.L.M.; de Oliveira, K.T.; de Freitas, L.M.; Fontana, C.R.; Nicholas, D.; McHale, A.; Callan, J.F.; et al. Phthalocyanine-loaded nanostructured lipid carriers functionalized with folic acid for photodynamic therapy. *Mater. Sci. Eng. C* **2020**, 108, 110462–110468, doi:10.1016/j.msec.2019.110462.
117. Qidwai, A.; Khan, S.; Md, S.; Fazil, M.; Baboota, S.; Narang, J.K.; Ali, J. Nanostructured lipid carrier in photodynamic therapy for the treatment of basal-cell carcinoma. *Drug Deliv.* **2016**, 23, 1476–1485, doi:10.3109/10717544.2016.1165310.
118. Wang, K.; Zhang, J.; de Sousa Júnior, W.T.; da Silva, V.C.M.; Rodrigues, M.C.; Morais, J.A.V.; Jiang, C.; Longo, J.P.F.; Azevedo, R.B.; Muehlmann, L.A. A xanthene derivative, free or associated to nanoparticles, as a new potential agent for anticancer photodynamic therapy. *J. Biomater. Sci. Polym. Ed.* **2020**, 31, 1977-1993, doi:10.1080/09205063.2020.1788370.
119. Zhang, Q.; Zhao, J.; Hu, H.; Yan, Y.; Hu, X.; Zhou, K.; Xiao, S.; Zhang, Y.; Feng, N. Construction and in vitro and in vivo evaluation of folic acid-modified nanostructured lipid carriers loaded with paclitaxel and chlorin e6. *Int. J. Pharm.* **2019**, 569, 118595–118606, doi:10.1016/j.ijpharm.2019.118595.
120. Xuefang Ding, Xian Xu, Ye Zhao, Lihui Zhang, Yadong Yu, Fei Huang, Dezhou Yin, He Huang. Tumour targeted nanostructured lipid carrier co-delivering paclitaxel and indocyanine green for laser triggered synergetic therapy of cancer. *RSC Advances* **2017**, 7, 35086–35095 doi:10.1039/C7RA06119
